# Supplementary material
Source: PubMed Central journal article supplement (PMC5560089)
Supplement: NIHMS890511-supplement-5.pdf [file NIHMS890511-supplement-5.pdf]

**Table S1. 708 genes required for fertility or cell communication were targeted by RNAi and assessed for DTC plexus defects.**

| Gene WB ID     | Gene Public Name | Sequence Name |
|----------------|------------------|---------------|
| WBGene00001303 | <i>emo-1</i>     | F32D8.6       |
| WBGene00004915 | <i>snr-2</i>     | W08E3.1       |
| WBGene00004807 | <i>skr-1</i>     | F46A9.5       |
| WBGene00004422 | <i>rpl-11.1</i>  | T22F3.4       |
| WBGene00006701 | <i>ubc-1</i>     | C35B1.1       |
| WBGene00021133 | <i>tomm-22</i>   | W10D9.5       |
| WBGene00004919 | <i>snr-6</i>     | Y49E10.15     |
| WBGene00007355 | <i>rpb-6</i>     | C06A1.5       |
| WBGene00003806 | <i>npp-20</i>    | Y77E11A.13    |
| WBGene00003076 | <i>lsm-1</i>     | F40F8.9       |
| WBGene00004454 | <i>rpl-41</i>    | C09H10.2      |
| WBGene00012187 | <i>rpb-11</i>    | W01G7.3       |
| WBGene00004916 | <i>snr-3</i>     | T28D9.10      |
| WBGene00003162 | <i>mdh-2</i>     | F20H11.3      |
| WBGene00001748 | <i>gsp-2</i>     | F56C9.1       |
| WBGene00009966 | <i>F53B7.3</i>   | F53B7.3       |
| WBGene00000142 | <i>aos-1</i>     | C08B6.9       |
| WBGene00004390 | <i>rnp-7</i>     | K04G7.10      |
| WBGene00002061 | <i>ife-3</i>     | B0348.6       |
| WBGene00019823 | <i>fnra-1</i>    | R02D3.5       |
| WBGene00001502 | <i>ftt-2</i>     | F52D10.3      |
| WBGene00000865 | <i>cyb-1</i>     | ZC168.4       |
| WBGene00021714 | <i>cyh-1</i>     | Y49F6B.1      |
| WBGene00010794 | <i>LLC1.3</i>    | LLC1.3        |
| WBGene00003825 | <i>ntl-2</i>     | B0286.4       |
| WBGene00003803 | <i>npp-17</i>    | F10G8.3       |
| WBGene00022742 | <i>ZK430.7</i>   | ZK430.7       |
| WBGene00006793 | <i>unc-59</i>    | W09C5.2       |
| WBGene00004180 | <i>pri-1</i>     | F58A4.4       |
| WBGene00001558 | <i>gdi-1</i>     | Y57G11C.10    |
| WBGene00019211 | <i>H18N23.2</i>  | H18N23.2      |
| WBGene00006863 | <i>gyg-1</i>     | F56B6.4       |
| WBGene00006540 | <i>tbg-1</i>     | F58A4.8       |
| WBGene00008920 | <i>eef-1G</i>    | F17C11.9      |
| WBGene00004721 | <i>san-1</i>     | ZC328.4       |
| WBGene00006373 | <i>syx-5</i>     | F55A11.2      |
| WBGene00005078 | <i>src-2</i>     | F49B2.5       |
| WBGene00001431 | <i>fkf-6</i>     | F31D4.3       |
| WBGene00018991 | <i>F56F11.4</i>  | F56F11.4      |
| WBGene00001168 | <i>eef-1A.1</i>  | F31E3.5       |
| WBGene00020930 | <i>hlh-30</i>    | W02C12.3      |
| WBGene00001039 | <i>drj-21</i>    | T19B4.4       |
| WBGene00004914 | <i>snr-1</i>     | Y116A8C.42    |
| WBGene00001911 | <i>his-37</i>    | C50F4.7       |
| WBGene00000209 | <i>asg-1</i>     | K07A12.3      |
| WBGene00003065 | <i>lpd-9</i>     | T21C9.5       |
| WBGene00003989 | <i>pfn-1</i>     | Y18D10A.20    |
| WBGene00004452 | <i>rpl-38</i>    | C06B8.8       |
| WBGene00019947 | <i>htz-1</i>     | R08C7.3       |
| WBGene00020931 | <i>W02D3.1</i>   | W02D3.1       |
| WBGene00012357 | <i>W09D6.4</i>   | W09D6.4       |
| WBGene00012216 | <i>W02D9.10</i>  | W02D9.10      |
| WBGene00021293 | <i>Y25C1A.6</i>  | Y25C1A.6      |
| WBGene00012553 | <i>cco-2</i>     | Y37D8A.14     |
| WBGene00015810 | <i>C16A3.5</i>   | C16A3.5       |
| WBGene00012550 | <i>Y37D8A.10</i> | Y37D8A.10     |
| WBGene00006725 | <i>ubl-1</i>     | H06I04.4      |
| WBGene00004821 | <i>skr-15</i>    | F54D10.1      |
| WBGene00009712 | <i>F44G4.2</i>   | F44G4.2       |
| WBGene00017772 | <i>clcc-1</i>    | F25B4.9       |

|                |                  |            |
|----------------|------------------|------------|
| WBGene00004438 | <i>rpl-25.1</i>  | F55D10.2   |
| WBGene00007974 | <i>dhfr-1</i>    | C36B1.7    |
| WBGene00004816 | <i>skr-10</i>    | Y105C5B.13 |
| WBGene00006583 | <i>tnc-2</i>     | ZK673.7    |
| WBGene00010678 | <i>K08F4.3</i>   | K08F4.3    |
| WBGene00000516 | <i>cki-1</i>     | T05A6.1    |
| WBGene00018793 | <i>F54C4.1</i>   | F54C4.1    |
| WBGene00006917 | <i>vha-8</i>     | C17H12.14  |
| WBGene00001234 | <i>EIF-6</i>     | C47B2.5    |
| WBGene00006715 | <i>ubc-20</i>    | F40G9.3    |
| WBGene00007019 | <i>mdt-19</i>    | Y71H2B.6   |
| WBGene00014086 | <i>ZK809.3</i>   | ZK809.3    |
| WBGene00000804 | <i>csc-1</i>     | Y48E1B.12  |
| WBGene00013094 | <i>Y51H1A.3</i>  | Y51H1A.3   |
| WBGene00000293 | <i>cap-2</i>     | M106.5     |
| WBGene00001229 | <i>EIF-3.F</i>   | D2013.7    |
| WBGene00006374 | <i>syx-4</i>     | T01B11.3   |
| WBGene00005018 | <i>sqt-3</i>     | F23H12.4   |
| WBGene00019767 | <i>rpa-2</i>     | M04F3.1    |
| WBGene00011883 | <i>T21B10.1</i>  | T21B10.1   |
| WBGene00004698 | <i>rsp-1</i>     | W02B12.3   |
| WBGene00004306 | <i>ran-5</i>     | R12C12.2   |
| WBGene00004705 | <i>rsp-8</i>     | C18D11.4   |
| WBGene00010556 | <i>rack-1</i>    | K04D7.1    |
| WBGene00012484 | <i>car-1</i>     | Y18D10A.17 |
| WBGene00007777 | <i>C27D8.1</i>   | C27D8.1    |
| WBGene00001031 | <i>dnj-13</i>    | F54D5.8    |
| WBGene00011510 | <i>T05H10.6</i>  | T05H10.6   |
| WBGene00001394 | <i>fat-2</i>     | W02A2.1    |
| WBGene00011831 | <i>T19B10.2</i>  | T19B10.2   |
| WBGene00015413 | <i>C04C3.3</i>   | C04C3.3    |
| WBGene00008452 | <i>mrps-5</i>    | E02A10.1   |
| WBGene00021038 | <i>W05F2.6</i>   | W05F2.6    |
| WBGene00003230 | <i>mex-5</i>     | W02A2.7    |
| WBGene00003831 | <i>nuo-1</i>     | C09H10.3   |
| WBGene00008338 | <i>C55A6.9</i>   | C55A6.9    |
| WBGene00018963 | <i>ucr-1</i>     | F56D2.1    |
| WBGene00013260 | <i>rsr-2</i>     | Y57A10A.19 |
| WBGene00015296 | <i>C01F1.1</i>   | C01F1.1    |
| WBGene00009448 | <i>zfp-2</i>     | F35H8.3    |
| WBGene00010304 | <i>clpf-1</i>    | F59A2.4    |
| WBGene00001582 | <i>gfi-2</i>     | K02A11.1   |
| WBGene00017716 | <i>F22F4.1</i>   | F22F4.1    |
| WBGene00006796 | <i>unc-62</i>    | T28F12.2   |
| WBGene00001340 | <i>etr-1</i>     | T01D1.2    |
| WBGene00002226 | <i>klp-16</i>    | C41G7.2    |
| WBGene00017895 | <i>vrk-1</i>     | F28B12.3   |
| WBGene00014095 | <i>ZK829.4</i>   | ZK829.4    |
| WBGene00003052 | <i>lmn-1</i>     | DY3.2      |
| WBGene00004980 | <i>spk-1</i>     | B0464.5    |
| WBGene00011480 | <i>T05E11.3</i>  | T05E11.3   |
| WBGene00010279 | <i>letm-1</i>    | F58G11.1   |
| WBGene00006914 | <i>vha-5</i>     | F35H10.4   |
| WBGene00002027 | <i>hsr-9</i>     | T05F1.6    |
| WBGene00003473 | <i>mtl-1</i>     | K11G9.6    |
| WBGene00020297 | <i>T07A9.9</i>   | T07A9.9    |
| WBGene00003474 | <i>mtl-2</i>     | T08G5.10   |
| WBGene00000447 | <i>ceh-24</i>    | F55B12.1   |
| WBGene00020636 | <i>T20H4.5</i>   | T20H4.5    |
| WBGene00004788 | <i>sft-4</i>     | C54H2.5    |
| WBGene00004887 | <i>smn-1</i>     | C41G7.1    |
| WBGene00003920 | <i>par-5</i>     | M117.2     |
| WBGene00000099 | <i>air-2</i>     | B0207.4    |
| WBGene00022455 | <i>Y110A7A.4</i> | Y110A7A.4  |
| WBGene00008505 | <i>F01G4.6</i>   | F01G4.6    |
| WBGene00003779 | <i>nob-1</i>     | Y75B8A.2   |
| WBGene00006433 | <i>sdhb-1</i>    | F42A8.2    |
| WBGene00000250 | <i>bir-2</i>     | C50B8.2    |

|                |                  |            |
|----------------|------------------|------------|
| WBGene00001948 | <i>hlh-1</i>     | B0304.1    |
| WBGene00000406 | <i>cdk-4</i>     | F18H3.5    |
| WBGene00000933 | <i>dap-3</i>     | C14A4.2    |
| WBGene00013737 | <i>tpst-1</i>    | Y111B2A.15 |
| WBGene00001250 | <i>elt-2</i>     | C33D3.1    |
| WBGene00013981 | <i>ZK507.6</i>   | ZK507.6    |
| WBGene00004010 | <i>pha-1</i>     | Y48A6C.5   |
| WBGene00000871 | <i>cye-1</i>     | C37A2.4    |
| WBGene00002050 | <i>ifa-1</i>     | F38B2.1    |
| WBGene00006595 | <i>top-1</i>     | M01E5.5    |
| WBGene00001093 | <i>drp-1</i>     | T12E12.4   |
| WBGene00004374 | <i>rme-2</i>     | T11F8.3    |
| WBGene00003020 | <i>lin-35</i>    | C32F10.2   |
| WBGene00003577 | <i>ndg-4</i>     | F56F3.2    |
| WBGene00003476 | <i>mtm-3</i>     | T24A11.1   |
| WBGene00003813 | <i>nrf-6</i>     | C08B11.4   |
| WBGene00000383 | <i>cdc-14</i>    | C17G10.4   |
| WBGene00000837 | <i>cul-2</i>     | ZK520.4    |
| WBGene00000585 | <i>cogc-2</i>    | C06G3.10   |
| WBGene00020064 | <i>kbp-1</i>     | R13F6.1    |
| WBGene00004823 | <i>skr-17</i>    | C06A8.4    |
| WBGene00018998 | <i>flap-1</i>    | F57B9.7    |
| WBGene00002068 | <i>ify-1</i>     | C27A2.3    |
| WBGene00001486 | <i>frh-1</i>     | F59G1.7    |
| WBGene00015842 | <i>C16C8.4</i>   | C16C8.4    |
| WBGene00020466 | <i>T12F5.1</i>   | T12F5.1    |
| WBGene00007623 | <i>C16C10.2</i>  | C16C10.2   |
| WBGene00009442 | <i>F35G12.5</i>  | F35G12.5   |
| WBGene00022851 | <i>ZK1127.4</i>  | ZK1127.4   |
| WBGene00016381 | <i>sgo-1</i>     | C33H5.15   |
| WBGene00008380 | <i>D1054.14</i>  | D1054.14   |
| WBGene00020392 | <i>knl-3</i>     | T10B5.6    |
| WBGene00019678 | <i>K12H4.3</i>   | K12H4.3    |
| WBGene00020073 | <i>sdz-28</i>    | R52.1      |
| WBGene00010353 | <i>H02I12.5</i>  | H02I12.5   |
| WBGene00001040 | <i>dnj-22</i>    | T23B12.7   |
| WBGene00022852 | <i>ZK1127.5</i>  | ZK1127.5   |
| WBGene00007110 | <i>B0035.11</i>  | B0035.11   |
| WBGene00015146 | <i>abi-1</i>     | B0336.6    |
| WBGene00004465 | <i>rpn-9</i>     | T06D8.8    |
| WBGene00018893 | <i>tag-345</i>   | F55F8.5    |
| WBGene00015943 | <i>tiar-1</i>    | C18A3.5    |
| WBGene00004985 | <i>spo-11</i>    | T05E11.4   |
| WBGene00011142 | <i>R08D7.1</i>   | R08D7.1    |
| WBGene00019400 | <i>K04G7.1</i>   | K04G7.1    |
| WBGene00009701 | <i>egg-3</i>     | F44F4.2    |
| WBGene00006735 | <i>ula-1</i>     | C26E6.8    |
| WBGene00018037 | <i>chtl-1</i>    | F35C8.7    |
| WBGene00009035 | <i>F22B3.4</i>   | F22B3.4    |
| WBGene00011747 | <i>sna-2</i>     | T13F2.7    |
| WBGene00007444 | <i>C08F8.2</i>   | C08F8.2    |
| WBGene00003788 | <i>npp-2</i>     | T01G9.4    |
| WBGene00001513 | <i>gad-1</i>     | T05H4.14   |
| WBGene00020375 | <i>T09B4.1</i>   | T09B4.1    |
| WBGene00002034 | <i>htp-3</i>     | F57C9.5    |
| WBGene00018890 | <i>F55F8.2</i>   | F55F8.2    |
| WBGene00019883 | <i>met-2</i>     | R05D3.11   |
| WBGene00001134 | <i>eat-3</i>     | D20I3.5    |
| WBGene00022855 | <i>tcer-1</i>    | ZK1127.9   |
| WBGene00010093 | <i>capg-2</i>    | F55C5.4    |
| WBGene00001005 | <i>dlc-1</i>     | T26A5.9    |
| WBGene00017926 | <i>F29C4.2</i>   | F29C4.2    |
| WBGene00022357 | <i>kbp-4</i>     | Y92C3B.1   |
| WBGene00000235 | <i>baf-1</i>     | B0464.7    |
| WBGene00001235 | <i>elb-1</i>     | Y41C4A.10  |
| WBGene00009734 | <i>F45G2.8</i>   | F45G2.8    |
| WBGene00013605 | <i>Y95D11A.1</i> | Y95D11A.1  |
| WBGene00004482 | <i>rps-13</i>    | C16A3.9    |

|                |                  |            |
|----------------|------------------|------------|
| WBGene00006708 | <i>ubc-13</i>    | Y54G2A.31  |
| WBGene00006713 | <i>ubc-18</i>    | R01H2.6    |
| WBGene00016249 | <i>C30C11.1</i>  | C30C11.1   |
| WBGene00004479 | <i>rps-10</i>    | D1007.6    |
| WBGene00004483 | <i>rps-14</i>    | F37C12.9   |
| WBGene00004430 | <i>rpl-18</i>    | Y45F10D.12 |
| WBGene00004429 | <i>rpl-17</i>    | Y48G8AL.8  |
| WBGene00010579 | <i>K05C4.2</i>   | K05C4.2    |
| WBGene00022043 | <i>Y65B4BR.8</i> | Y65B4BR.8  |
| WBGene00004813 | <i>skr-7</i>     | Y47D7A.1   |
| WBGene00015164 | <i>ykt-6</i>     | B0361.10   |
| WBGene00011334 | <i>T01E8.6</i>   | T01E8.6    |
| WBGene00022881 | <i>ZK1248.11</i> | ZK1248.11  |
| WBGene00021035 | <i>W05F2.3</i>   | W05F2.3    |
| WBGene00019495 | <i>sdz-24</i>    | K07E8.3    |
| WBGene00020320 | <i>T07F8.4</i>   | T07F8.4    |
| WBGene00008825 | <i>F14H3.6</i>   | F14H3.6    |
| WBGene00012903 | <i>vps-2</i>     | Y46G5A.12  |
| WBGene00009478 | <i>syx-7</i>     | F36F2.4    |
| WBGene00006585 | <i>tni-3</i>     | T20B3.2    |
| WBGene00021644 | <i>Y47G6A.18</i> | Y47G6A.18  |
| WBGene00017244 | <i>apy-1</i>     | F08C6.6    |
| WBGene00016142 | <i>C26E6.6</i>   | C26E6.6    |
| WBGene00021910 | <i>stim-1</i>    | Y55B1BM.1  |
| WBGene00011722 | <i>T11G6.8</i>   | T11G6.8    |
| WBGene00010766 | <i>K11B4.1</i>   | K11B4.1    |
| WBGene00010892 | <i>M18.8</i>     | M18.8      |
| WBGene00006536 | <i>tbb-1</i>     | K01G5.7    |
| WBGene00011638 | <i>ostb-1</i>    | T09A5.11   |
| WBGene00021074 | <i>W07E6.2</i>   | W07E6.2    |
| WBGene00019680 | <i>K12H4.5</i>   | K12H4.5    |
| WBGene00006515 | <i>tag-170</i>   | C05D11.3   |
| WBGene00016204 | <i>gsto-1</i>    | C29E4.7    |
| WBGene00010036 | <i>cpar-1</i>    | F54C8.2    |
| WBGene00017356 | <i>F10E9.4</i>   | F10E9.4    |
| WBGene00017319 | <i>F09G8.3</i>   | F09G8.3    |
| WBGene00000263 | <i>F23H11.5</i>  | F23H11.5   |
| WBGene00017830 | <i>rpb-8</i>     | F26F4.11   |
| WBGene00003826 | <i>ntl-3</i>     | Y56A3A.1   |
| WBGene00009595 | <i>F40F12.7</i>  | F40F12.7   |
| WBGene00044318 | <i>tag-267</i>   | W06E11.2   |
| WBGene00022798 | <i>ZK688.3</i>   | ZK688.3    |
| WBGene00020443 | <i>esy1-2</i>    | T12A2.15   |
| WBGene00012652 | <i>Y39A1A.14</i> | Y39A1A.14  |
| WBGene00010905 | <i>M88.2</i>     | M88.2      |
| WBGene00006396 | <i>taf-12</i>    | Y56A3A.4   |
| WBGene00012645 | <i>Y39A1A.6</i>  | Y39A1A.6   |
| WBGene00021901 | <i>tag-262</i>   | Y54H5A.3   |
| WBGene00022793 | <i>ZK686.3</i>   | ZK686.3    |
| WBGene00012166 | <i>nuo-6</i>     | W01A8.4    |
| WBGene00009161 | <i>F26E4.6</i>   | F26E4.6    |
| WBGene00018597 | <i>F48C1.4</i>   | F48C1.4    |
| WBGene00019253 | <i>H31G24.1</i>  | H31G24.1   |
| WBGene00013406 | <i>Y63D3A.7</i>  | Y63D3A.7   |
| WBGene00021839 | <i>nduf-5</i>    | Y54E10BL.5 |
| WBGene00008414 | <i>D2030.4</i>   | D2030.4    |
| WBGene00007412 | <i>stip-1</i>    | C07E3.1    |
| WBGene00009688 | <i>F44E5.1</i>   | F44E5.1    |
| WBGene00006882 | <i>vab-19</i>    | T22D2.1    |
| WBGene00007684 | <i>C18E9.4</i>   | C18E9.4    |
| WBGene00011634 | <i>T09A5.5</i>   | T09A5.5    |
| WBGene00018475 | <i>F45E12.5</i>  | F45E12.5   |
| WBGene00017925 | <i>F29B9.11</i>  | F29B9.11   |
| WBGene00021921 | <i>Y55F3AM.3</i> | Y55F3AM.3  |
| WBGene00017121 | <i>cyc-2.1</i>   | E04A4.7    |
| WBGene00017073 | <i>D2096.6</i>   | D2096.6    |
| WBGene00002196 | <i>kin-10</i>    | T01G9.6    |
| WBGene00001999 | <i>hrp-1</i>     | F42A6.7    |

|                |                  |           |
|----------------|------------------|-----------|
| WBGene00006542 | <i>tbp-1</i>     | T20B12.2  |
| WBGene00004931 | <i>sod-2</i>     | F10D11.1  |
| WBGene00002827 | <i>let-653</i>   | C29E6.1   |
| WBGene00017982 | <i>F32D1.2</i>   | F32D1.2   |
| WBGene00011892 | <i>T21C9.4</i>   | T21C9.4   |
| WBGene00011015 | <i>R04F11.2</i>  | R04F11.2  |
| WBGene00011391 | <i>T03D8.2</i>   | T03D8.2   |
| WBGene00014112 | <i>ZK856.11</i>  | ZK856.11  |
| WBGene00001974 | <i>hmg-4</i>     | T20B12.8  |
| WBGene00004194 | <i>prx-5</i>     | C34C6.6   |
| WBGene00002216 | <i>klp-3</i>     | T09A5.2   |
| WBGene00020423 | <i>T10F2.4</i>   | T10F2.4   |
| WBGene00006386 | <i>taf-5</i>     | F30F8.8   |
| WBGene00000836 | <i>cul-1</i>     | D2045.6   |
| WBGene00000382 | <i>cdc-6</i>     | C43E11.10 |
| WBGene00004754 | <i>sec-23</i>    | Y113G7A.3 |
| WBGene00003902 | <i>pab-1</i>     | Y106G6H.2 |
| WBGene00016837 | <i>C50F2.3</i>   | C50F2.3   |
| WBGene00006382 | <i>taf-1</i>     | W04A8.7   |
| WBGene00010629 | <i>K07C5.6</i>   | K07C5.6   |
| WBGene00012528 | <i>pap-1</i>     | Y32F6A.3  |
| WBGene00005015 | <i>spt-5</i>     | K08E4.1   |
| WBGene00003367 | <i>mix-1</i>     | M106.1    |
| WBGene00002203 | <i>kin-20</i>    | F46F2.2   |
| WBGene00000833 | <i>cts-1</i>     | T20G5.2   |
| WBGene00000150 | <i>apm-1</i>     | F55A12.7  |
| WBGene00004320 | <i>rbx-1</i>     | ZK287.5   |
| WBGene00002066 | <i>ifg-1</i>     | M110.4    |
| WBGene00008670 | <i>F11A3.2</i>   | F11A3.2   |
| WBGene00001002 | <i>div-1</i>     | R01H10.1  |
| WBGene00019121 | <i>npl-4.2</i>   | F59E12.5  |
| WBGene00020921 | <i>W01C8.5</i>   | W01C8.5   |
| WBGene00009119 | <i>F25H2.5</i>   | F25H2.5   |
| WBGene00018149 | <i>F37C12.1</i>  | F37C12.1  |
| WBGene00010428 | <i>dcn-1</i>     | H38K22.2  |
| WBGene00007400 | <i>C07A9.2</i>   | C07A9.2   |
| WBGene00020107 | <i>R151.2</i>    | R151.2    |
| WBGene00017423 | <i>F13C5.2</i>   | F13C5.2   |
| WBGene00021022 | <i>W04B5.5</i>   | W04B5.5   |
| WBGene00022458 | <i>Y110A7A.8</i> | Y110A7A.8 |
| WBGene00018064 | <i>F35F11.1</i>  | F35F11.1  |
| WBGene00015478 | <i>C05D10.2</i>  | C05D10.2  |
| WBGene00007463 | <i>C08H9.2</i>   | C08H9.2   |
| WBGene00021759 | <i>Y50D7A.11</i> | Y50D7A.11 |
| WBGene00011412 | <i>T04A8.11</i>  | T04A8.11  |
| WBGene00012977 | <i>Y48A6C.4</i>  | Y48A6C.4  |
| WBGene00001740 | <i>gro-1</i>     | ZC395.6   |
| WBGene00011367 | <i>T02C12.2</i>  | T02C12.2  |
| WBGene00006463 | <i>nduf-2.2</i>  | T26A5.3   |
| WBGene00000276 | <i>byn-1</i>     | F57B9.5   |
| WBGene00000673 | <i>col-98</i>    | F14F7.1   |
| WBGene00008514 | <i>F02A9.4</i>   | F02A9.4   |
| WBGene00000770 | <i>cpb-1</i>     | C40H1.1   |
| WBGene00007980 | <i>C36E8.1</i>   | C36E8.1   |
| WBGene00018152 | <i>acs-4</i>     | F37C12.7  |
| WBGene00000872 | <i>cyk-1</i>     | F11H8.4   |
| WBGene00019380 | <i>K04C2.2</i>   | K04C2.2   |
| WBGene00016170 | <i>C27F2.8</i>   | C27F2.8   |
| WBGene00003134 | <i>mat-3</i>     | F10C5.1   |
| WBGene00006516 | <i>vps-16</i>    | C05D11.2  |
| WBGene00017778 | <i>psf-1</i>     | F25B5.7   |
| WBGene00021503 | <i>Y40D12A.2</i> | Y40D12A.2 |
| WBGene00044072 | <i>tag-246</i>   | ZK1128.5  |
| WBGene00022801 | <i>pcp-5</i>     | ZK688.6   |
| WBGene00000799 | <i>crn-6</i>     | K04H4.6   |
| WBGene00021533 | <i>Y42G9A.3</i>  | Y42G9A.3  |
| WBGene00019836 | <i>R02F2.7</i>   | R02F2.7   |
| WBGene00011815 | <i>bath-43</i>   | T16H12.5  |

|                 |            |            |
|-----------------|------------|------------|
| WBGene00022797  | ZK688.2    | ZK688.2    |
| WBGene00017302  | F09F7.5    | F09F7.5    |
| WBGene00003589  | nex-2      | T07C4.9    |
| WBGene00001087  | dpy-28     | Y39A1B.3   |
| WBGene00020068  | cra-1      | R13F6.10   |
| WBGene00007008  | rfp-1      | R05D3.4    |
| WBGene00004735  | sbp-1      | Y47D3B.7   |
| WBGene00015525  | rha-2      | C06E1.10   |
| WBGene00000371  | cco-1      | F26E4.9    |
| WBGene00004244  | puf-8      | C30G12.7   |
| WBGene00004888  | smo-1      | K12C11.2   |
| WBGene00009051  | nduf-6     | F22D6.4    |
| WBGene00003123  | mag-1      | R09B3.5    |
| WBGene00009454  | F36A2.7    | F36A2.7    |
| WBGene00020348  | T08B2.8    | T08B2.8    |
| WBGene00023172  | Y23H5A.8   | Y23H5A.8   |
| WBGene00012376  | nduf-7     | W10D5.2    |
| WBGene00016740  | C48B6.2    | C48B6.2    |
| WBGene00013958  | ZK265.6    | ZK265.6    |
| WBGene00009668  | cflm-1     | F43G9.5    |
| WBGene00021638  | Y47G6A.9   | Y47G6A.9   |
| WBGene00012735  | sptf-3     | Y40B1A.4   |
| WBGene00019005  | F57B10.8   | F57B10.8   |
| WBGene00019076  | F59A3.3    | F59A3.3    |
| WBGene00008612  | fbxa-103   | F09C3.4    |
| WBGene00000502  | chp-1      | Y110A7A.13 |
| WBGene00001647  | gna-2      | T23G11.2   |
| WBGene00012950  | Y47H9C.7   | Y47H9C.7   |
| WBGene00011058  | fdps-1     | R06C1.2    |
| WBGene00004415  | rpl-4      | B0041.4    |
| WBGene000006518 | tag-173    | F27D4.5    |
| WBGene00011944  | T23D8.3    | T23D8.3    |
| WBGene00013128  | Y52B11A.9  | Y52B11A.9  |
| WBGene00015021  | B0205.6    | B0205.6    |
| WBGene00012487  | Y18D10A.23 | Y18D10A.23 |
| WBGene00007857  | C31H5.6    | C31H5.6    |
| WBGene00006565  | tfg-1      | Y63D3A.5   |
| WBGene00011064  | R06C7.5    | R06C7.5    |
| WBGene00013593  | Y87G2A.1   | Y87G2A.1   |
| WBGene00008413  | D2030.3    | D2030.3    |
| WBGene00001333  | erm-1      | C01G8.5    |
| WBGene00021327  | Y34D9A.1   | Y34D9A.1   |
| WBGene00003790  | npp-4      | Y54E5A.4   |
| WBGene00019698  | riok-1     | M01B12.5   |
| WBGene00003062  | lpd-6      | K09H9.6    |
| WBGene00004043  | plk-2      | Y71F9B.7   |
| WBGene00016906  | C53D5.5    | C53D5.5    |
| WBGene00011971  | T23G11.6   | T23G11.6   |
| WBGene00009052  | ekl-1      | F22D6.6    |
| WBGene00007252  | C01H6.2    | C01H6.2    |
| WBGene00021680  | Y48G1C.7   | Y48G1C.7   |
| WBGene00002783  | let-607    | F57B10.1   |
| WBGene00022464  | Y110A7A.19 | Y110A7A.19 |
| WBGene00004143  | pqn-59     | R119.4     |
| WBGene00001568  | gei-11     | F32H2.1    |
| WBGene00018891  | F55F8.3    | F55F8.3    |
| WBGene00003074  | lars-2     | ZK524.3    |
| WBGene00021277  | Y23H5B.6   | Y23H5B.6   |
| WBGene00004186  | prpf-4     | F22D6.5    |
| WBGene00007975  | gls-1      | C36B1.8    |
| WBGene00010562  | cdc-48.3   | K04G2.3    |
| WBGene00001596  | gld-2      | ZC308.1    |
| WBGene00021660  | Y48G1A.4   | Y48G1A.4   |
| WBGene00007047  | wts-1      | T20F10.1   |
| WBGene00018508  | F46F11.1   | F46F11.1   |
| WBGene00003847  | blmp-1     | F25D7.3    |
| WBGene00013129  | Y52B11A.10 | Y52B11A.10 |
| WBGene00000079  | adr-1      | H15N14.1   |

|                |                   |            |
|----------------|-------------------|------------|
| WBGene00004753 | <i>sec-8</i>      | Y106G6H.7  |
| WBGene00009127 | <i>F25H5.5</i>    | F25H5.5    |
| WBGene00001066 | <i>dpy-4</i>      | Y41E3.2    |
| WBGene00015205 | <i>B0495.6</i>    | B0495.6    |
| WBGene00022119 | <i>Y71F9AL.17</i> | Y71F9AL.17 |
| WBGene00018866 | <i>F55A12.8</i>   | F55A12.8   |
| WBGene00002041 | <i>hum-8</i>      | Y66H1A.6   |
| WBGene00010545 | <i>K03H1.10</i>   | K03H1.10   |
| WBGene00008400 | <i>drh-3</i>      | D2005.5    |
| WBGene00010993 | <i>R03E1.2</i>    | R03E1.2    |
| WBGene00022739 | <i>toe-1</i>      | ZK430.1    |
| WBGene00007029 | <i>mys-1</i>      | VC5.4      |
| WBGene00001130 | <i>dyn-1</i>      | C02C6.1    |
| WBGene00018270 | <i>F41C3.4</i>    | F41C3.4    |
| WBGene00012602 | <i>Y38E10A.24</i> | Y38E10A.24 |
| WBGene00017056 | <i>D2062.4</i>    | D2062.4    |
| WBGene00012992 | <i>Y48C3A.10</i>  | Y48C3A.10  |
| WBGene00007014 | <i>mdt-10</i>     | T09A5.6    |
| WBGene00006875 | <i>vab-9</i>      | T22C8.8    |
| WBGene00008404 | <i>D2013.6</i>    | D2013.6    |
| WBGene00013255 | <i>Y57A10A.10</i> | Y57A10A.10 |
| WBGene00010458 | <i>K01C8.6</i>    | K01C8.6    |
| WBGene00012005 | <i>jun-1</i>      | T24H10.7   |
| WBGene00011759 | <i>T13H5.5</i>    | T13H5.5    |
| WBGene00008455 | <i>E02H1.1</i>    | E02H1.1    |
| WBGene00017746 | <i>F23F1.5</i>    | F23F1.5    |
| WBGene00012329 | <i>sre-44</i>     | W07G1.2    |
| WBGene00013168 | <i>arp-1</i>      | Y53F4B.22  |
| WBGene00013267 | <i>Y57A10A.27</i> | Y57A10A.27 |
| WBGene00008640 | <i>F10B5.3</i>    | F10B5.3    |
| WBGene00003526 | <i>nas-7</i>      | C07D10.4   |
| WBGene00003730 | <i>nhx-2</i>      | B0495.4    |
| WBGene00003119 | <i>mac-1</i>      | Y48C3A.7   |
| WBGene00007479 | <i>C09F9.2</i>    | C09F9.2    |
| WBGene00016116 | <i>C25H3.7</i>    | C25H3.7    |
| WBGene00012204 | <i>W02B12.9</i>   | W02B12.9   |
| WBGene00013144 | <i>Y53C12B.2</i>  | Y53C12B.2  |
| WBGene00015297 | <i>sco-1</i>      | C01F1.2    |
| WBGene00020796 | <i>T25D3.2</i>    | T25D3.2    |
| WBGene00010051 | <i>F54D5.5</i>    | F54D5.5    |
| WBGene00019893 | <i>sgt-1</i>      | R05F9.10   |
| WBGene00007192 | <i>B0491.5</i>    | B0491.5    |
| WBGene00015513 | <i>C06A8.2</i>    | C06A8.2    |
| WBGene00000894 | <i>dab-1</i>      | M110.5     |
| WBGene00021546 | <i>Y43H11AL.2</i> | Y43H11AL.2 |
| WBGene00004185 | <i>pro-1</i>      | R166.4     |
| WBGene00015515 | <i>spdl-1</i>     | C06A8.5    |
| WBGene00001402 | <i>fbf-2</i>      | F21H12.5   |
| WBGene00013004 | <i>Y48E1B.5</i>   | Y48E1B.5   |
| WBGene00007464 | <i>C08H9.3</i>    | C08H9.3    |
| WBGene00012458 | <i>ash-2</i>      | Y17G7B.2   |
| WBGene00011523 | <i>T06D8.2</i>    | T06D8.2    |
| WBGene00013096 | <i>mcd-1</i>      | Y51H1A.6   |
| WBGene00017124 | <i>E04F6.4</i>    | E04F6.4    |
| WBGene00011348 | <i>T01H3.2</i>    | T01H3.2    |
| WBGene00018355 | <i>F42G2.6</i>    | F42G2.6    |
| WBGene00010830 | <i>M02G9.1</i>    | M02G9.1    |
| WBGene00000890 | <i>sig-7</i>      | F39H2.2    |
| WBGene00006737 | <i>ulp-2</i>      | Y38A8.3    |
| WBGene00011067 | <i>vps-11</i>     | R06F6.2    |
| WBGene00000410 | <i>cdk-9</i>      | H25P06.2   |
| WBGene00007413 | <i>pro-2</i>      | C07E3.2    |
| WBGene00009661 | <i>patr-1</i>     | F43G6.9    |
| WBGene00001186 | <i>egl-18</i>     | F55A8.1    |
| WBGene00003073 | <i>lars-1</i>     | R74.1      |
| WBGene00001352 | <i>evl-14</i>     | H38K22.1   |
| WBGene00009078 | <i>rpb-12</i>     | F23B2.13   |
| WBGene00019945 | <i>R08C7.1</i>    | R08C7.1    |

|                |                   |            |
|----------------|-------------------|------------|
| WBGene00009653 | <i>F43D9.1</i>    | F43D9.1    |
| WBGene00017924 | <i>F29B9.10</i>   | F29B9.10   |
| WBGene00001906 | <i>his-32</i>     | F17E9.10   |
| WBGene00022776 | <i>ZK616.6</i>    | ZK616.6    |
| WBGene00011740 | <i>T12G3.5</i>    | T12G3.5    |
| WBGene00022312 | <i>clcc-171</i>   | Y77E11A.9  |
| WBGene00016793 | <i>arp-11</i>     | C49H3.8    |
| WBGene00010485 | <i>ant-1.3</i>    | K01H12.2   |
| WBGene00016374 | <i>swd-2.2</i>    | C33H5.7    |
| WBGene00019948 | <i>R08C7.4</i>    | R08C7.4    |
| WBGene00018932 | <i>F56B3.8</i>    | F56B3.8    |
| WBGene00021882 | <i>Y54G2A.17</i>  | Y54G2A.17  |
| WBGene00009893 | <i>F49E11.7</i>   | F49E11.7   |
| WBGene00003130 | <i>map-2</i>      | Y116A8A.9  |
| WBGene00010709 | <i>nol-9</i>      | K09B11.2   |
| WBGene00001241 | <i>elo-3</i>      | D2024.3    |
| WBGene00007199 | <i>B0513.7</i>    | B0513.7    |
| WBGene00019264 | <i>H35B03.2</i>   | H35B03.2   |
| WBGene00018361 | <i>F42G8.10</i>   | F42G8.10   |
| WBGene00020296 | <i>T07A9.8</i>    | T07A9.8    |
| WBGene00022046 | <i>Y66H1A.4</i>   | Y66H1A.4   |
| WBGene00015538 | <i>sams-3</i>     | C06E7.1    |
| WBGene00000816 | <i>csn-4</i>      | Y55F3AM.15 |
| WBGene00000817 | <i>csn-5</i>      | B0547.1    |
| WBGene00004056 | <i>pmk-2</i>      | F42G8.3    |
| WBGene00006416 | <i>sams-5</i>     | T13A10.11  |
| WBGene00001007 | <i>dli-1</i>      | C39E9.14   |
| WBGene00012888 | <i>sas-6</i>      | Y45F10D.9  |
| WBGene00011481 | <i>imp-2</i>      | T05E11.5   |
| WBGene00009006 | <i>F21D5.1</i>    | F21D5.1    |
| WBGene00008686 | <i>F11A10.5</i>   | F11A10.5   |
| WBGene00019821 | <i>R02D3.3</i>    | R02D3.3    |
| WBGene00001338 | <i>ears-2</i>     | T07A9.2    |
| WBGene00022310 | <i>Y77E11A.7</i>  | Y77E11A.7  |
| WBGene00016376 | <i>sec-10</i>     | C33H5.9    |
| WBGene00006699 | <i>uba-1</i>      | C47E12.5   |
| WBGene00014078 | <i>ZK792.5</i>    | ZK792.5    |
| WBGene00010890 | <i>ddb-1</i>      | M18.5      |
| WBGene00004140 | <i>pqn-55</i>     | R09E10.7   |
| WBGene00022301 | <i>cpsf-1</i>     | Y76B12C.7  |
| WBGene00012769 | <i>Y41E3.11</i>   | Y41E3.11   |
| WBGene00000441 | <i>ceh-18</i>     | ZC64.3     |
| WBGene00017641 | <i>csr-1</i>      | F20D12.1   |
| WBGene00001310 | <i>end-1</i>      | F58E10.2   |
| WBGene00020865 | <i>T27E4.7</i>    | T27E4.7    |
| WBGene00002344 | <i>let-70</i>     | M7.1       |
| WBGene00007616 | <i>C15H11.8</i>   | C15H11.8   |
| WBGene00001915 | <i>his-41</i>     | C50F4.5    |
| WBGene00003861 | <i>oig-3</i>      | Y50E8A.3   |
| WBGene00008620 | <i>F09C6.10</i>   | F09C6.10   |
| WBGene00016989 | <i>CD4.3</i>      | CD4.3      |
| WBGene00016990 | <i>vps-37</i>     | CD4.4      |
| WBGene00005241 | <i>srh-16</i>     | F55C5.9    |
| WBGene00010473 | <i>cdr-5</i>      | K01D12.14  |
| WBGene00003846 | <i>odd-2</i>      | C34H3.2    |
| WBGene00013677 | <i>Y105E8A.19</i> | Y105E8A.19 |
| WBGene00000449 | <i>ceh-27</i>     | F46F3.1    |
| WBGene00008225 | <i>C50B8.3</i>    | C50B8.3    |
| WBGene00020910 | <i>W01A11.2</i>   | W01A11.2   |
| WBGene00000813 | <i>csn-1</i>      | Y59A8A.1   |
| WBGene00018823 | <i>F54E2.1</i>    | F54E2.1    |
| WBGene00013585 | <i>cyp-42A1</i>   | Y80D3A.5   |
| WBGene00009485 | <i>F36G9.3</i>    | F36G9.3    |
| WBGene00020999 | <i>W03F9.1</i>    | W03F9.1    |
| WBGene00013687 | <i>exoc-8</i>     | Y105E8B.2  |
| WBGene00004909 | <i>snf-10</i>     | Y32F6A.2   |
| WBGene00003816 | <i>asns-1</i>     | F25G6.6    |
| WBGene00000876 | <i>cyl-1</i>      | C52E4.6    |



|                |                   |            |
|----------------|-------------------|------------|
| WBGene00019353 | <i>K03B4.1</i>    | K03B4.1    |
| WBGene00003406 | <i>mrg-1</i>      | Y37D8A.9   |
| WBGene00001857 | <i>hil-6</i>      | F59A7.4    |
| WBGene00009992 | <i>F53F4.10</i>   | F53F4.10   |
| WBGene00010867 | <i>tag-260</i>    | M04G12.1   |
| WBGene00017984 | <i>F32D1.5</i>    | F32D1.5    |
| WBGene00013766 | <i>prmt-1</i>     | Y113G7B.17 |
| WBGene00020705 | <i>T22H9.1</i>    | T22H9.1    |
| WBGene00008346 | <i>C56A3.8</i>    | C56A3.8    |
| WBGene00004020 | <i>pho-1</i>      | EGAP2.3    |
| WBGene00006311 | <i>sun-1</i>      | F57B1.2    |
| WBGene00020808 | <i>T25F10.6</i>   | T25F10.6   |
| WBGene00009103 | <i>F25B3.6</i>    | F25B3.6    |
| WBGene00003812 | <i>nrf-5</i>      | F55B12.5   |
| WBGene00002632 | <i>let-413</i>    | F26D11.11  |
| WBGene00010631 | <i>cash-1</i>     | K07C5.8    |
| WBGene00001089 | <i>dre-1</i>      | K04A8.6    |
| WBGene00020340 | <i>T08B1.1</i>    | T08B1.1    |
| WBGene00011318 | <i>cdt-2</i>      | T01C3.1    |
| WBGene00004203 | <i>psa-1</i>      | Y113G7B.23 |
| WBGene00003025 | <i>lin-40</i>     | T27C4.4    |
| WBGene00001095 | <i>dars-2</i>     | F10C2.6    |
| WBGene00001110 | <i>duo-1</i>      | F38B7.5    |
| WBGene00000228 | <i>atn-1</i>      | W04D2.1    |
| WBGene00009084 | <i>F23B12.7</i>   | F23B12.7   |
| WBGene00012337 | <i>W07G4.3</i>    | W07G4.3    |
| WBGene00003242 | <i>mig-6</i>      | C37C3.6    |
| WBGene00009098 | <i>ehbp-1</i>     | F25B3.1    |
| WBGene00006935 | <i>vars-1</i>     | ZC513.4    |
| WBGene00002148 | <i>gon-14</i>     | F44C4.4    |
| WBGene00002229 | <i>klp-19</i>     | Y43F4B.6   |
| WBGene00018812 | <i>F54D11.2</i>   | F54D11.2   |
| WBGene00017295 | <i>F09E10.5</i>   | F09E10.5   |
| WBGene00004949 | <i>sox-2</i>      | K08A8.2    |
| WBGene00019760 | <i>calu-1</i>     | M03F4.7    |
| WBGene00003087 | <i>lsy-2</i>      | F49H12.1   |
| WBGene00019620 | <i>fah-1</i>      | K10C2.4    |
| WBGene00008605 | <i>mlt-9</i>      | F09B12.1   |
| WBGene00008746 | <i>F13E6.2</i>    | F13E6.2    |
| WBGene00004238 | <i>ptr-24</i>     | F46G10.5   |
| WBGene00018878 | <i>glit-1</i>     | F55D10.3   |
| WBGene00018640 | <i>F49E10.2</i>   | F49E10.2   |
| WBGene00007287 | <i>gck-4</i>      | C04A11.3   |
| WBGene00018016 | <i>lrr-1</i>      | F33G12.4   |
| WBGene00002001 | <i>hars-1</i>     | T11G6.1    |
| WBGene00002879 | <i>let-754</i>    | C29E4.8    |
| WBGene00020097 | <i>larp-1</i>     | R144.7     |
| WBGene00017237 | <i>pole-2</i>     | F08B4.5    |
| WBGene00010870 | <i>M05B5.2</i>    | M05B5.2    |
| WBGene00001859 | <i>hil-8</i>      | T05E8.2    |
| WBGene00000413 | <i>cdt-1</i>      | Y54E10A.15 |
| WBGene00012990 | <i>Y48C3A.8</i>   | Y48C3A.8   |
| WBGene00019219 | <i>H20J04.4</i>   | H20J04.4   |
| WBGene00021313 | <i>paqr-2</i>     | Y32H12A.5  |
| WBGene00006444 | <i>shn-1</i>      | C33B4.3    |
| WBGene00004090 | <i>ppp-1</i>      | C15F1.4    |
| WBGene00018285 | <i>smk-1</i>      | F41E6.4    |
| WBGene00010425 | <i>lpin-1</i>     | H37A05.1   |
| WBGene00013680 | <i>Y105E8A.23</i> | Y105E8A.23 |
| WBGene00003561 | <i>ncr-1</i>      | F02E8.6    |
| WBGene00020441 | <i>T12A2.7</i>    | T12A2.7    |
| WBGene00019402 | <i>K04G7.11</i>   | K04G7.11   |
| WBGene00003041 | <i>lin-61</i>     | R06C7.7    |
| WBGene00021445 | <i>Y39A3CR.5</i>  | Y39A3CR.5  |
| WBGene00002201 | <i>kin-18</i>     | T17E9.1    |
| WBGene00009455 | <i>phip-1</i>     | F36A2.8    |
| WBGene00015092 | <i>B0261.4</i>    | B0261.4    |
| WBGene00003083 | <i>lst-1</i>      | T22A3.3    |

|                |                 |            |
|----------------|-----------------|------------|
| WBGene00021541 | <i>Y42H9B.3</i> | Y42H9B.3   |
| WBGene00020901 | <i>T28F2.2</i>  | T28F2.2    |
| WBGene00009128 | <i>F25H5.6</i>  | F25H5.6    |
| WBGene00012732 | <i>Y40B1A.1</i> | Y40B1A.1   |
| WBGene00005023 | <i>sqv-5</i>    | T24D1.1    |
| WBGene00019502 | <i>K07G6.1</i>  | K07G6.1    |
| WBGene00019489 | <i>K07E1.1</i>  | K07E1.1    |
| WBGene00002079 | <i>xpo-2</i>    | Y48G1A.5   |
| WBGene00000390 | <i>cdc-42</i>   | R07G3.1    |
| WBGene00000424 | <i>ced-10</i>   | C09G12.8   |
| WBGene00004266 | <i>rab-1</i>    | C39F7.4    |
| WBGene00004273 | <i>rab-10</i>   | T23H2.5    |
| WBGene00022678 | <i>sar-1</i>    | ZK180.4    |
| WBGene00004302 | <i>ran-1</i>    | K01G5.4    |
| WBGene00003401 | <i>mpk-1</i>    | F43C1.2    |
| WBGene00001834 | <i>hda-1</i>    | C53A5.3    |
| WBGene00004927 | <i>snx-1</i>    | C05D9.1    |
| WBGene00006352 | <i>sur-6</i>    | F26E4.1    |
| WBGene00000183 | <i>arf-3</i>    | F57H12.1   |
| WBGene00004268 | <i>rab-5</i>    | F26H9.6    |
| WBGene00003829 | <i>nud-1</i>    | F53A2.4    |
| WBGene00003395 | <i>mom-2</i>    | F38E1.7    |
| WBGene00002246 | <i>lag-2</i>    | Y73C8B.4   |
| WBGene00001061 | <i>dpl-1</i>    | T23G7.1    |
| WBGene00000566 | <i>cnt-2</i>    | Y39A1A.15  |
| WBGene00002245 | <i>lag-1</i>    | K08B4.1    |
| WBGene00008311 | <i>rskn-2</i>   | C54G4.1    |
| WBGene00001996 | <i>hpl-2</i>    | K01G5.2    |
| WBGene00003239 | <i>mig-2</i>    | C35C5.4    |
| WBGene00004357 | <i>rho-1</i>    | Y51H4A.3   |
| WBGene00001972 | <i>hmg-1.2</i>  | F47D12.4   |
| WBGene00002992 | <i>lin-3</i>    | F36H1.4    |
| WBGene00001082 | <i>dpy-23</i>   | R160.1     |
| WBGene00004297 | <i>rad-51</i>   | Y43C5A.6   |
| WBGene00003048 | <i>lit-1</i>    | W06F12.1   |
| WBGene00003605 | <i>nhr-6</i>    | C48D5.1    |
| WBGene00004786 | <i>sex-1</i>    | F44A6.2    |
| WBGene00006751 | <i>unc-11</i>   | C32E8.10   |
| WBGene00006773 | <i>unc-37</i>   | W02D3.9    |
| WBGene00002007 | <i>hsp-3</i>    | C15H9.6    |
| WBGene00003397 | <i>mom-5</i>    | T23D8.1    |
| WBGene00000548 | <i>clr-1</i>    | F56D1.4    |
| WBGene00007784 | <i>ruvb-1</i>   | C27H6.2    |
| WBGene00001835 | <i>hda-2</i>    | C08B11.2   |
| WBGene00021170 | <i>arx-4</i>    | Y6D11A.2   |
| WBGene00000199 | <i>arx-1</i>    | Y71F9AL.16 |
| WBGene00004205 | <i>psr-1</i>    | F29B9.4    |
| WBGene00000182 | <i>arf-1.2</i>  | B0336.2    |
| WBGene00001561 | <i>gei-4</i>    | W07B3.2    |
| WBGene00003893 | <i>ost-1</i>    | C44B12.2   |
| WBGene00007352 | <i>cdc-48.1</i> | C06A1.1    |
| WBGene00007554 | <i>pptr-2</i>   | C13G3.3    |
| WBGene00002147 | <i>ire-1</i>    | C41C4.4    |
| WBGene00006794 | <i>unc-60</i>   | C38C3.5    |
| WBGene00002010 | <i>hsp-6</i>    | C37H5.8    |
| WBGene00022193 | <i>ppfr-4</i>   | Y71H2B.3   |
| WBGene00012939 | <i>Y47D3B.1</i> | Y47D3B.1   |
| WBGene00003670 | <i>nhr-80</i>   | H10E21.3   |
| WBGene00001688 | <i>gpr-1</i>    | F22B7.13   |
| WBGene00002081 | <i>ina-1</i>    | F54G8.3    |
| WBGene00019030 | <i>inf-1</i>    | F58B6.2    |
| WBGene00000201 | <i>arx-3</i>    | Y79H2A.6   |
| WBGene00000205 | <i>arx-7</i>    | M01B12.3   |
| WBGene00000089 | <i>aex-6</i>    | Y87G2A.4   |
| WBGene00004202 | <i>pry-1</i>    | C37A5.9    |
| WBGene00021275 | <i>Y23H5B.4</i> | Y23H5B.4   |
| WBGene00016265 | <i>nmur-4</i>   | C30F12.6   |
| WBGene00016328 | <i>pde-5</i>    | C32E12.2   |

|                |                   |            |
|----------------|-------------------|------------|
| WBGene00003186 | <i>mek-2</i>      | Y54E10BL.6 |
| WBGene00003639 | <i>nhr-49</i>     | K10C3.6    |
| WBGene00006805 | <i>unc-73</i>     | F55C7.7    |
| WBGene00006958 | <i>wve-1</i>      | R06C1.3    |
| WBGene00004778 | <i>ser-3</i>      | K02F2.6    |
| WBGene00009116 | <i>F25H2.2</i>    | F25H2.2    |
| WBGene00004271 | <i>rab-7</i>      | W03C9.3    |
| WBGene00002008 | <i>hsp-4</i>      | F43E2.8    |
| WBGene00002297 | <i>ect-2</i>      | T19E10.1   |
| WBGene00006787 | <i>unc-52</i>     | ZC101.2    |
| WBGene00004264 | <i>qua-1</i>      | T05C12.10  |
| WBGene00007006 | <i>npr-3</i>      | C10C6.2    |
| WBGene00020689 | <i>npr-12</i>     | T22D1.12   |
| WBGene00002335 | <i>let-60</i>     | ZK792.6    |
| WBGene00001330 | <i>eps-8</i>      | Y57G11C.24 |
| WBGene00004077 | <i>pop-1</i>      | W10C8.2    |
| WBGene00006757 | <i>unc-18</i>     | F27D9.1    |
| WBGene00000203 | <i>arx-5</i>      | Y37D8A.1   |
| WBGene00005791 | <i>srw-44</i>     | F14F8.6    |
| WBGene00003650 | <i>nhr-60</i>     | F57A10.5   |
| WBGene00007260 | <i>olm-1</i>      | C02C6.2    |
| WBGene00009932 | <i>F52D10.6</i>   | F52D10.6   |
| WBGene00021324 | <i>Y34B4A.8</i>   | Y34B4A.8   |
| WBGene00003891 | <i>osm-11</i>     | F11C7.5    |
| WBGene00003056 | <i>lon-2</i>      | C39E6.1    |
| WBGene00004854 | <i>slt-1</i>      | F40E10.4   |
| WBGene00020712 | <i>ckr-1</i>      | T23B3.4    |
| WBGene00014051 | <i>tag-341</i>    | ZK669.1    |
| WBGene00022004 | <i>Y59H11AL.1</i> | Y59H11AL.1 |
| WBGene00006957 | <i>wsp-1</i>      | C07G1.4    |
| WBGene00003776 | <i>nmy-1</i>      | F52B10.1   |
| WBGene00004947 | <i>sos-1</i>      | T28F12.3   |
| WBGene00002694 | <i>let-502</i>    | C10H11.9   |
| WBGene00004287 | <i>rac-2</i>      | K03D3.10   |
| WBGene00011734 | <i>mlc-5</i>      | T12D8.6    |

For each RNAi clone tested, the corresponding gene WormBase ID, public name, and sequence name are given. We examined 5 – 66 animals per RNAi treatment after L1 plating to detect DTC plexus defects.
