# Supplementary material
Source: PubMed Central journal article supplement (PMC5560089)
Supplement: NIHMS890511-supplement-6.pdf [file NIHMS890511-supplement-6.pdf]

**Table S2. Identification of genes required for DTC plexus formation in an L1 RNAi experiment.**

| <b>Sequence Name</b> | <b>Gene ID</b>    | <b>Total Scored</b> | <b>DTC Plexus Defect</b> | <b>Other Phenotypes Observed</b>      |
|----------------------|-------------------|---------------------|--------------------------|---------------------------------------|
| Y77E11A.7            | <i>Y77E11A.7</i>  | 6                   | +++                      |                                       |
| Y48G1C.7             | <i>Y48G1C.7</i>   | 8                   | +++                      | <b>fgcs, large nuclei</b>             |
| C15F1.4              | <i>ppp-1</i>      | 6                   | +++                      | <b>fgcs</b>                           |
| B0491.5              | <i>B0491.5</i>    | 7                   | +++                      |                                       |
| Y48G1A.4             | <i>Y48G1A.4</i>   | 11                  | +++                      | <b>fgcs, Rbs</b>                      |
| F10C2.6              | <i>dars-2</i>     | 13                  | +++                      | <b>fgcs</b>                           |
| C33H5.9              | <i>sec-10</i>     | 8                   | +++                      | <b>large nuclei</b>                   |
| W02B12.9             | <i>W02B12.9</i>   | 9                   | +++                      | Rbs                                   |
| Y66H1A.4             | <i>Y66H1A.4</i>   | 7                   | +++                      | Sick                                  |
| W07E6.2              | <i>W07E6.2</i>    | 12                  | +++                      | <b>fgcs</b>                           |
| F26F4.11             | <i>rpb-8</i>      | 10                  | +++                      | <b>fgcs</b>                           |
| C39E9.14             | <i>dli-1</i>      | 5                   | +++                      | Egl                                   |
| M18.5                | <i>ddb-1</i>      | 13                  | +++                      |                                       |
| F20H11.3             | <i>mdh-2</i>      | 21                  | +++                      |                                       |
| F22D6.5              | <i>prpf-4</i>     | 17                  | +++                      | <b>fgcs</b>                           |
| ZC64.3               | <i>ceh-18</i>     | 12                  | +++                      | <b>large nuclei</b>                   |
| W01G7.3              | <i>rpb-11</i>     | 22                  | +++                      | <b>fgcs</b>                           |
| Y38E10A.24           | <i>Y38E10A.24</i> | 16                  | +++                      |                                       |
| F23B12.7             | <i>F23B12.7</i>   | 13                  | +++                      |                                       |
| K04A8.6              | <i>dre-1</i>      | 20                  | +++                      | <b>fgcs</b>                           |
| C16A3.5              | <i>C16A3.5</i>    | 21                  | ++                       |                                       |
| H35B03.2             | <i>H35B03.2</i>   | 14                  | ++                       |                                       |
| F52D10.3             | <i>ftt-2</i>      | 11                  | ++                       | Rup, Egl                              |
| R02D3.5              | <i>fnta-1</i>     | 20                  | ++                       |                                       |
| F43G6.9              | <i>patr-1</i>     | 21                  | ++                       |                                       |
| R06C1.2              | <i>fdps-1</i>     | 17                  | ++                       | <b>no oocytes</b>                     |
| Y41E3.11             | <i>Y41E3.11</i>   | 13                  | ++                       |                                       |
| F42G8.10             | <i>F42G8.10</i>   | 13                  | ++                       |                                       |
| C17H12.14            | <i>vha-8</i>      | 22                  | ++                       |                                       |
| F10G8.3              | <i>npp-17</i>     | 19                  | ++                       | <b>fgcs, increased sperm</b>          |
| M106.1               | <i>mix-1</i>      | 20                  | ++                       | <b>differentiating gcs, fgcs, Mig</b> |
| C37C3.6              | <i>mig-6</i>      | 5                   | ++                       | Mig                                   |
| T27C4.4              | <i>lin-40</i>     | 21                  | ++                       |                                       |
| T22H9.1              | <i>T22H9.1</i>    | 16                  | ++                       | Rup                                   |
| Y55F3AM.15           | <i>csn-4</i>      | 17                  | ++                       | Sick                                  |
| C09F9.2              | <i>C09F9.2</i>    | 17                  | ++                       |                                       |
| T05H10.6             | <i>T05H10.6</i>   | 23                  | ++                       |                                       |
| F21H12.5             | <i>fbf-2</i>      | 18                  | ++                       |                                       |
| F10E9.4              | <i>F10E9.4</i>    | 18                  | ++                       | <b>fgcs</b>                           |
| F29B9.10             | <i>F29B9.10</i>   | 18                  | ++                       |                                       |
| Y48E1B.5             | <i>Y48E1B.5</i>   | 19                  | ++                       |                                       |

|          |                 |     |    |                        |
|----------|-----------------|-----|----|------------------------|
| C09H10.3 | <i>nuo-1</i>    | 26  | ++ | <b>fgcs</b>            |
| Y49E10.6 | <i>his-72</i>   | 20  | ++ |                        |
| C04C3.3  | <i>C04C3.3</i>  | 20  | ++ |                        |
| T04A8.11 | <i>T04A8.11</i> | 20  | ++ | <b>fgcs</b> , Muv, Mig |
| Y73C8B.4 | <i>lag-2</i>    | 133 | +  | <b>fgcs</b>            |

Penetrance of DTC defect observed was scored as follows: +++,  $\geq 30\%$  penetrance defect; ++,  $\geq 15\%$  defect; +,  $\geq 5\%$  defect. As a positive control, *lag-2* RNAi was examined and showed a low penetrance defect (10/133 animals). Phenotypes reported were observed in  $\geq 3$  animals. Animals were scored as 1-1.5-day-adults following exposure to RNAi from the L1 larval stage. **fgcs** (fewer germ cells), Rbs (Reduced brood size), Ste (Sterile), Egl (Egg-laying defective), Rup (ruptured through the vulva), Mig (DTC migration defective), Muv (Multivulva). Germ cell phenotypes are bolded. Sick animals were small and sluggish.
