# Supplementary material
Source: PubMed Central journal article supplement (PMC5560089)
Supplement: NIHMS890511-supplement-7.pdf [file NIHMS890511-supplement-7.pdf]

**Table S3. Genes required for viability and developmental progression following L1 exposure to RNAi.**

| Sequence Name | Gene ID         | Phenotype                        |
|---------------|-----------------|----------------------------------|
| C08B6.9       | <i>aos-1</i>    | Ste, arrest                      |
| F55A12.7      | <i>apm-1</i>    | <b>fgcs</b> , Ste                |
| B0336.2       | <i>arf-1.2</i>  | Ste                              |
| D2045.1       | <i>atx-2</i>    | Rbs, Rup                         |
| F25D7.3       | <i>blmp-1</i>   | Rup                              |
| F57B9.5       | <i>byn-1</i>    | <b>fgcs</b> , Ste                |
| C06A8.2       | <i>C06A8.2</i>  | delay                            |
| C08H9.3       | <i>C08H9.3</i>  | Rbs, delay                       |
| C50F2.3       | <i>C50F2.3</i>  | Ste, arrest                      |
| R07G3.1       | <i>cdc-42</i>   | Ste, Rup                         |
| K04G2.3       | <i>cdc-48.3</i> | <b>fgcs</b> , Ste                |
| Y54E10A.15    | <i>cdt-1</i>    | Ste, Pvl                         |
| T25G3.2       | <i>chs-1</i>    | delay                            |
| Y77E11A.9     | <i>clec-171</i> | Ste, delay                       |
| F56D1.4       | <i>clr-1</i>    | Ste, Rup, Clr                    |
| Y71F9AL.17    | <i>copa-1</i>   | Let                              |
| Y76B12C.7     | <i>cpsf-1</i>   | Sm                               |
| T20G5.2       | <i>cts-1</i>    | <b>fgcs</b> , Ste                |
| C52E4.6       | <i>cyl-1</i>    | Egl                              |
| D1054.14      | <i>D1054.14</i> | Ste, Rup                         |
| T19B4.4       | <i>dnj-21</i>   | <b>fgcs, no oocytes</b> , arrest |
| T23B12.7      | <i>dnj-22</i>   | Ste                              |
| M110.5        | <i>dyn-1</i>    | Let, arrest, rup                 |
| E02H1.1       | <i>E02H1.1</i>  | Ste, delay                       |
| D2013.7       | <i>eif-3.F</i>  | delay                            |
| F32D8.6       | <i>emo-1</i>    | arrest                           |
| F01G4.6       | <i>F01G4.6</i>  | Ste                              |
| F02A9.4       | <i>F02A9.4</i>  | Ste, delay                       |
| F10B5.3       | <i>F10B5.3</i>  | Ste, Pvl                         |
| F11A3.2       | <i>F11A3.2</i>  | <b>no germ cells</b> , Ste       |
| F43D9.1       | <i>F43D9.1</i>  | Ste, Pvl, Rup                    |
| F44G4.2       | <i>F44G4.2</i>  | <b>fgcs</b> , Ste                |
| F46F11.1      | <i>F46F11.1</i> | arrest                           |
| F53B7.3       | <i>F53B7.3</i>  | Ste                              |
| F55A12.8      | <i>F55A12.8</i> | Ste, Pvl                         |
| F55F8.3       | <i>F55F8.3</i>  | Rbs, Pvl, delay                  |
| F32H2.1       | <i>gei-11</i>   | <b>fgcs</b> , Ste                |
| F22B7.13      | <i>gpr-1</i>    | <b>Large nuclei</b> , Ste        |
| T11G6.1       | <i>hars-1</i>   | arrest                           |
| C53A5.3       | <i>hda-1</i>    | Ste                              |
| F54G8.3       | <i>ina-1</i>    | Ste                              |
| K04C2.2       | <i>K04C2.2</i>  | <b>fgcs</b> , Ste                |

|            |                 |                                        |
|------------|-----------------|----------------------------------------|
| K12H4.3    | <i>K12H4.3</i>  | Ste                                    |
| F57B10.1   | <i>let-607</i>  | Rup, delay                             |
| M7.1       | <i>let-70</i>   | Ste                                    |
| C29E4.8    | <i>let-754</i>  | Ste                                    |
| F36H1.4    | <i>lin-3</i>    | Ste                                    |
| W06F12.1   | <i>lit-1</i>    | <b>Differentiating</b> , Ste, Pvl, Rup |
| LLC1.3     | <i>dld-1</i>    | Ste, arrest                            |
| H37A05.1   | <i>lpin-1</i>   | Let, Pvl, Rup, Clr                     |
| Y48C3A.7   | <i>mac-1</i>    | Ste                                    |
| F09B12.1   | <i>mlt-9</i>    | Let                                    |
| B0495.4    | <i>nhx-2</i>    | delay                                  |
| Y77E11A.13 | <i>npp-20</i>   | Ste, arrest                            |
| Y106G6H.2  | <i>pab-1</i>    | Ste, Pvl                               |
| W10C8.2    | <i>pop-1</i>    | Rbs, Rup, Pvl                          |
| Y113G7B.23 | <i>psa-1</i>    | <b>fgcs</b> , Ste, Pvl, Rup            |
| R03E1.2    | <i>R03E1.2</i>  | Ste, Pvl, arrest                       |
| R08C7.1    | <i>R08C7.1</i>  | Ste                                    |
| R08D7.1    | <i>R08D7.1</i>  | Ste, Pvl                               |
| C39F7.4    | <i>rab-1</i>    | arrest                                 |
| K01G5.4    | <i>ran-1</i>    | Ste                                    |
| Y51H4A.3   | <i>rho-1</i>    | Ste, Pvl, Rup                          |
| K04G7.10   | <i>rnp-7</i>    | Ste, Pvl, <b>fgcs</b>                  |
| T22F3.4    | <i>rpl-11.1</i> | delay                                  |
| Y45F10D.12 | <i>rpl-18</i>   | <b>no germ cells</b> , delay           |
| C09H10.2   | <i>rpl-41</i>   | arrest                                 |
| Y105E8A.23 | <i>rpom-1</i>   | delay                                  |
| Y57A10A.19 | <i>rsr-2</i>    | Rup                                    |
| C27H6.2    | <i>ruvb-1</i>   | Ste, Pvl, Rup                          |
| ZC328.4    | <i>san-1</i>    | delay                                  |
| ZK180.4    | <i>sar-1</i>    | arrest                                 |
| C01F1.2    | <i>sco-1</i>    | delay                                  |
| C33H5.15   | <i>sgo-1</i>    | Ste, Pvl                               |
| W08E3.1    | <i>snr-2</i>    | arrest                                 |
| T28D9.10   | <i>snr-3</i>    | Clr, arrest                            |
| Y49E10.15  | <i>snr-6</i>    | Ste, arrest                            |
| K08E4.1    | <i>spt-5</i>    | <b>fgcs</b> , Ste, Pvl                 |
| F26E4.1    | <i>sur-6</i>    | Ste                                    |
| T13H5.5    | <i>T13H5.5</i>  | Ste, delay                             |
| T20H4.5    | <i>T20H4.5</i>  | Ste                                    |
| W04A8.7    | <i>taf-1</i>    | Ste, arrest                            |
| W10D9.5    | <i>tomm-22</i>  | arrest                                 |
| C47E12.5   | <i>uba-1</i>    | arrest                                 |
| H06I04.4   | <i>ubl-1</i>    | Let, arrest                            |
| F56D2.1    | <i>ucr-1</i>    | Ste, delay                             |
| C47E8.7    | <i>unc-112</i>  | Paralyzed                              |
| W09C5.2    | <i>unc-59</i>   | <b>fgcs</b> , Ste                      |

|            |                   |                                                     |
|------------|-------------------|-----------------------------------------------------|
| C38C3.5    | <i>unc-60</i>     | Ste                                                 |
| ZC513.4    | <i>vars-1</i>     | Ste                                                 |
| W03F9.1    | <i>W03F9.1</i>    | Ste                                                 |
| Y110A7A.19 | <i>Y110A7A.19</i> | Ste, Pvl                                            |
| Y39A1A.14  | <i>Y39A1A.14</i>  | <b>fgcs</b> , Ste, Pvl, Rup                         |
| Y43H11AL.2 | <i>Y43H11AL.2</i> | Ste, Pvl                                            |
| Y47D3B.1   | <i>Y47D3B.1</i>   | Let                                                 |
| Y48A6C.4   | <i>Y48A6C.4</i>   | <b>no germ cells</b> , Ste                          |
| Y52B11A.10 | <i>Y52B11A.10</i> | <b>fgcs</b> , Ste                                   |
| ZK1127.5   | <i>ZK1127.5</i>   | <b>differentiating gcs</b> , <b>fgcs</b> , Ste, Pvl |
| ZK430.7    | <i>ZK430.7</i>    | Ste                                                 |
| ZK616.6    | <i>ZK616.6</i>    | Rbs, Ste, Pvl                                       |

Phenotypes reported were observed in > 3 animals. fgcs (fewer germ cells), Rbs (Reduced brood size), Ste (Sterile), Egl (Egg-laying defective), Rup (ruptured through the vulva), Mig (DTC migration defective), Muv (Multivulva), Pvl (Protruded vulva). Germ cell phenotypes are bolded. Sterile worms could not be rapidly distinguished from developmentally delayed young adults.
