# Supplementary material
Source: PubMed Central journal article supplement (PMC5560089)
Supplement: NIHMS890511-supplement-8.pdf [file NIHMS890511-supplement-8.pdf]

**Table S4. Identification of genes required for DTC plexus formation in an L3/L4 RNAi experiment.**

| Sequence Name | Gene ID         | Total Scored | DTC Plexus Defect | Other Phenotypes Observed |
|---------------|-----------------|--------------|-------------------|---------------------------|
| T11G6.1       | <i>hars-1</i>   | 10           | +++               |                           |
| C09H10.3      | <i>nuo-1</i>    | 11           | +++               | <b>fgcs</b>               |
| C47E8.7       | <i>unc-112</i>  | 17           | +++               |                           |
| T27C4.4       | <i>lin-40</i>   | 19           | +++               | <b>fgcs</b>               |
| C33H5.9       | <i>sec-10</i>   | 18           | +++               | <b>fgcs</b>               |
| F23B12.7      | <i>F23B12.7</i> | 19           | +++               |                           |
| C47E12.5      | <i>uba-1</i>    | 18           | +++               |                           |
| K01G5.4       | <i>ran-1</i>    | 15           | +++               |                           |
| Y71F9AL.17    | <i>copa-1</i>   | 9            | +++               | Ste                       |
| K04A8.6       | <i>dre-1</i>    | 29           | ++                | <b>fgcs</b>               |
| T22F3.4       | <i>rpl-11.1</i> | 17           | ++                |                           |
| F52D10.3      | <i>ftt-2</i>    | 18           | ++                |                           |
| F32D8.6       | <i>emo-1</i>    | 15           | ++                | <b>fgcs</b>               |
| C29E4.8       | <i>let-754</i>  | 16           | ++                |                           |
| Y106G6H.2     | <i>pab-1</i>    | 29           | ++                |                           |
| R08C7.1       | <i>R08C7.1</i>  | 25           | ++                | <b>fgcs, Clr, sick</b>    |
| F56D1.4       | <i>clr-1</i>    | 21           | ++                | <b>gonad rupture</b>      |
| M110.5        | <i>dyn-1</i>    | 24           | ++                |                           |
| K04G7.10      | <i>rnp-7</i>    | 20           | ++                |                           |
| Y105E8A.23    | <i>rpom-1</i>   | 20           | ++                |                           |
| C16A3.5       | <i>C16A3.5</i>  | 20           | ++                |                           |
| W08E3.1       | <i>snr-2</i>    | 16           | ++                | <b>fgcs</b>               |
| LLC1.3        | <i>dld-1</i>    | 19           | ++                |                           |
| F26E4.1       | <i>sur-6</i>    | 19           | ++                |                           |
| ZK180.4       | <i>sar-1</i>    | 19           | ++                |                           |
| C15F1.4       | <i>ppp-1</i>    | 19           | ++                |                           |
| W07E6.2       | <i>W07E6.2</i>  | 26           | ++                |                           |
| Y49E10.6      | <i>his-72</i>   | 20           | ++                |                           |
| F36H1.4       | <i>lin-3</i>    | 27           | ++                |                           |
| Y48G1C.7      | <i>Y48G1C.7</i> | 22           | +                 |                           |
| C50F2.3       | <i>C50F2.3</i>  | 30           | +                 | <b>fgcs</b>               |
| C53A5.3       | <i>hda-1</i>    | 23           | +                 |                           |
| Y48C3A.7      | <i>mac-1</i>    | 23           | +                 |                           |
| ZK1127.5      | <i>ZK1127.5</i> | 31           | +                 |                           |
| Y48A6C.4      | <i>Y48A6C.4</i> | 31           | +                 |                           |
| W03F9.1       | <i>W03F9.1</i>  | 24           | +                 |                           |
| W02B12.9      | <i>W02B12.9</i> | 24           | +                 |                           |

|            |                 |    |   |              |
|------------|-----------------|----|---|--------------|
| C09H10.2   | <i>rpl-41</i>   | 24 | + |              |
| F21H12.5   | <i>fbf-2</i>    | 24 | + | large nuclei |
| Y45F10D.12 | <i>rpl-18</i>   | 16 | + |              |
| D2013.7    | <i>eif-3.F</i>  | 17 | + |              |
| F43G6.9    | <i>patr-1</i>   | 26 | + |              |
| T20H4.5    | <i>T20H4.5</i>  | 26 | + |              |
| M117.2     | <i>par-5</i>    | 18 | + |              |
| T05H10.6   | <i>T05H10.6</i> | 18 | + |              |
| K04G2.3    | <i>cdc-48.3</i> | 9  | + |              |
| M18.5      | <i>ddb-1</i>    | 18 | + |              |
| ZK616.6    | <i>ZK616.6</i>  | 19 | + |              |
| C33H5.15   | <i>sgo-1</i>    | 30 | + |              |
| F20H11.3   | <i>mdh-2</i>    | 20 | + |              |
| H35B03.2   | <i>H35B03.2</i> | 20 | + |              |
| F10G8.3    | <i>npp-17</i>   | 20 | + |              |
| T13H5.5    | <i>T13H5.5</i>  | 21 | + |              |
| F09B12.1   | <i>mlt-9</i>    | 21 | + |              |
| M7.1       | <i>let-70</i>   | 22 | - |              |
| C06A8.2    | <i>C06A8.2</i>  | 23 | - |              |
| B0495.4    | <i>nhx-2</i>    | 23 | - |              |
| F25D7.3    | <i>blmp-1</i>   | 24 | - |              |
| K08E4.1    | <i>spt-5</i>    | 26 | - |              |
| F55F8.3    | <i>F55F8.3</i>  | 26 | - |              |
| W09C5.2    | <i>unc-59</i>   | 27 | - |              |
| Y41E3.11   | <i>Y41E3.11</i> | 14 | - |              |
| F10E9.4    | <i>F10E9.4</i>  | 30 | - |              |
| F32H2.1    | <i>gei-11</i>   | 15 | - |              |
| C04C3.3    | <i>C04C3.3</i>  | 15 | - |              |
| D1054.14   | <i>D1054.14</i> | 31 | - |              |
| ZC513.4    | <i>vars-1</i>   | 17 | - |              |
| Y66H1A.4   | <i>Y66H1A.4</i> | 36 | - | Mig          |
| C27H6.2    | <i>ruvb-1</i>   | 18 | - |              |
| W06F12.1   | <i>lit-1</i>    | 19 | - |              |
| Y51H4A.3   | <i>rho-1</i>    | 19 | - |              |
| C01F1.2    | <i>sco-1</i>    | 19 | - |              |
| F44G4.2    | <i>F44G4.2</i>  | 20 | - |              |
| F57B10.1   | <i>let-607</i>  | 20 | - |              |
| C37C3.6    | <i>mig-6</i>    | 20 | - |              |
| C52E4.6    | <i>cyl-1</i>    | 20 | - |              |
| F43D9.1    | <i>F43D9.1</i>  | 21 | - |              |
| F55A12.8   | <i>F55A12.8</i> | 21 | - |              |
| H06I04.4   | <i>ubl-1</i>    | 21 | - |              |

|            |                   |    |   |                     |
|------------|-------------------|----|---|---------------------|
| R06C1.2    | <i>fdps-1</i>     | 21 | - |                     |
| C39E9.14   | <i>dli-1</i>      | 22 | - |                     |
| F29B9.10   | <i>F29B9.10</i>   | 22 | - |                     |
| Y110A7A.19 | <i>Y110A7A.19</i> | 23 | - |                     |
| ZK430.7    | <i>ZK430.7</i>    | 23 | - |                     |
| Y76B12C.7  | <i>cpsf-1</i>     | 23 | - |                     |
| Y77E11A.13 | <i>npp-20</i>     | 23 | - |                     |
| F57B9.5    | <i>byn-1</i>      | 25 | - |                     |
| Y55F3AM.15 | <i>csn-4</i>      | 25 | - |                     |
| T22H9.1    | <i>T22H9.1</i>    | 25 | - |                     |
| F22B7.13   | <i>gpr-1</i>      | 26 | - | <b>large nuclei</b> |
| Y48E1B.5   | <i>Y48E1B.5</i>   | 26 | - |                     |
| W10C8.2    | <i>pop-1</i>      | 27 | - |                     |
| C38C3.5    | <i>unc-60</i>     | 29 | - |                     |
| K12H4.3    | <i>K12H4.3</i>    | 29 | - |                     |
| B0336.2    | <i>arf-1.2</i>    | 30 | - |                     |
| Y57A10A.19 | <i>rsr-2</i>      | 31 | - |                     |
| F11A3.2    | <i>F11A3.2</i>    | 33 | - |                     |
| Y113G7B.23 | <i>psa-1</i>      | 25 | - |                     |
| Y39A1A.14  | <i>Y39A1A.14</i>  | 22 | - |                     |
| R03E1.2    | <i>R03E1.2</i>    | 20 | - |                     |
| F10B5.3    | <i>F10B5.3</i>    | 22 | - |                     |
| Y43H11AL.2 | <i>Y43H11AL.2</i> | 19 | - |                     |
| Y54E10A.15 | <i>cdt-1</i>      | 19 | - |                     |
| R08D7.1    | <i>R08D7.1</i>    | 18 | - |                     |
| F02A9.4    | <i>F02A9.4</i>    | 26 | - |                     |
| E02H1.1    | <i>E02H1.1</i>    | 20 | - |                     |
| Y77E11A.9  | <i>clec-171</i>   | 23 | - |                     |
| F56D2.1    | <i>ucr-1</i>      | 19 | - |                     |
| W04A8.7    | <i>taf-1</i>      | 27 | - |                     |
| Y49E10.15  | <i>snr-6</i>      | 18 | - | <b>large nuclei</b> |
| C08B6.9    | <i>aos-1</i>      | 23 | - |                     |
| K04C2.2    | <i>K04C2.2</i>    | 22 | - |                     |
| T20G5.2    | <i>cts-1</i>      | 11 | - |                     |
| T23B12.7   | <i>dnj-22</i>     | 14 | - |                     |
| Y52B11A.10 | <i>Y52B11A.10</i> | 34 | - |                     |
| F55A12.7   | <i>apm-1</i>      | 24 | - |                     |
| F54G8.3    | <i>ina-1</i>      | 26 | - |                     |
| F01G4.6    | <i>F01G4.6</i>    | 30 | - |                     |
| F53B7.3    | <i>F53B7.3</i>    | 20 | - |                     |
| D2045.1    | <i>atx-2</i>      | 8  | - |                     |
| C08H9.3    | <i>C08H9.3</i>    | 20 | - |                     |

|            |                       |     |   |
|------------|-----------------------|-----|---|
| Y48G1A.4   | <b>Y48G1A.4</b>       | 10  | - |
| T04A8.11   | <b>T04A8.11</b>       | 23  | - |
| M106.1     | <b><i>mix-1</i></b>   | 26  | - |
| H37A05.1   | <b><i>lpin-1</i></b>  | 17  | - |
| Y47D3B.1   | <b>Y47D3B.1</b>       | 30  | - |
| T25G3.2    | <b><i>chs-1</i></b>   | 22  | - |
| ZC328.4    | <b><i>san-1</i></b>   | 24  | - |
| T28D9.10   | <b><i>snr-3</i></b>   | 20  | - |
| T19B4.4    | <b><i>dnj-21</i></b>  | 26  | - |
| W10D9.5    | <b><i>tomm-22</i></b> | 23  | - |
| F46F11.1   | <b>F46F11.1</b>       | 26  | - |
| C39F7.4    | <b><i>rab-1</i></b>   | 18  | - |
| W01G7.3    | <b><i>rpb-11</i></b>  | 18  | - |
| Y77E11A.7  | <b>Y77E11A.7</b>      | 27  | - |
| F26F4.11   | <b><i>rpb-8</i></b>   | 30  | - |
| F10C2.6    | <b><i>dars-2</i></b>  | 19  | - |
| C17H12.14  | <b><i>vha-8</i></b>   | 10  | - |
| ZC64.3     | <b><i>ceh-18</i></b>  | 15  | - |
| F22D6.5    | <b><i>prpf-4</i></b>  | 10  | - |
| Y38E10A.24 | <b>Y38E10A.24</b>     | 22  | - |
| R02D3.5    | <b><i>fnta-1</i></b>  | 19  | - |
| B0491.5    | <b>B0491.5</b>        | 25  | - |
| F42G8.10   | <b>F42G8.10</b>       | 24  | - |
| C09F9.2    | <b>C09F9.2</b>        | 24  | - |
| control    | <b>L4440</b>          | 270 | - |

Penetrance of DTC defect observed was scored as follows: +++, > 30% penetrance defect; ++, > 15% defect; +, > 10% defect; -, 0-9% defect. Phenotypes reported were observed in > 3 animals. Germ cell phenotypes are bolded. Animals were scored as 1.5-2-day-adults following exposure to RNAi from the L3/L4 larval stage. fgcs (fewer germ cells), Mig (DTC migration defective), Ste (Sterile), Clr (Clear). Sick animals were small and sluggish.
