# Supplementary material
Source: PubMed Central journal article supplement (PMC5560089)
Supplement: NIHMS890511-supplement-9.pdf [file NIHMS890511-supplement-9.pdf]

**Table S5.** Mutant analysis and off-target RNAi controls.

| Genotype/Treatment                | DTC Phenotype |           |    |
|-----------------------------------|---------------|-----------|----|
|                                   | Defect        | Wild-type | N  |
| wild-type                         | 0             | 30        | 30 |
| <i>lin-40(gk255)</i>              | 27            | 0         | 27 |
| <i>exoc-8(ok2523)<sup>a</sup></i> | 7             | 17        | 24 |
| <i>his-72(tm2066)</i>             | 13            | 38        | 51 |
| <i>sur-6(sv30)</i>                | 14            | 21        | 35 |
| <i>ftt-2(n4426)</i>               | 5             | 44        | 49 |

**Off-target RNAi control experiment:**

**DTC-specific RNAi [*lag-2>RDE-1; rrf-3; rde-1(ne219)*]**

|                          |    |    |    |
|--------------------------|----|----|----|
| <i>L4440</i>             | 0  | 30 | 30 |
| <i>ran-1<sup>b</sup></i> | 30 | 0  | 30 |
| <i>par-5<sup>c</sup></i> | 0  | 33 | 33 |
| <i>ftt-2<sup>c</sup></i> | 4  | 28 | 32 |

**Germ cell-specific RNAi [*rrf-1(pk1417)*]**

|                            |    |    |    |
|----------------------------|----|----|----|
| <i>L4440</i>               | 2  | 59 | 61 |
| <i>W07E6.2<sup>b</sup></i> | 1  | 46 | 47 |
| <i>par-5<sup>c</sup></i>   | 24 | 41 | 65 |
| <i>ftt-2<sup>c</sup></i>   | 1  | 69 | 70 |

One-day-adult animals were scored for available putative null alleles or following L1 plating on RNAi.

<sup>a</sup>*exoc-8(ok2523)* is the only viable allele for members of the octameric exocyst complex, which includes *sec-10/EXOC-5*.

<sup>b</sup>600 bp or <sup>c</sup>200 bp dsRNA constructs were designed to minimize off-target effects.
