# Supplementary material
Source: PubMed Central journal article supplement (PMC5560089)
Supplement: NIHMS890511-supplement-10.pdf [file NIHMS890511-supplement-10.pdf]

**Table S6** DTC-specific RNAi strain selectivity.

**RNAi to germline-essential genes**

|                    | Proximal tumors |                       |
|--------------------|-----------------|-----------------------|
|                    | <i>rrf-1</i>    | <i>lag-2&gt;RDE-1</i> |
| <i>control</i>     | 1/52            | 0/57                  |
| <i>gld-1</i>       | 45/49           | 0/68                  |
| F1 sterility       |                 |                       |
|                    | <i>rrf-1</i>    | <i>lag-2&gt;RDE-1</i> |
| <i>control</i>     | 0/16            | 0/80                  |
| <i>glh-1</i>       | 11/86           | 0/118                 |
| <i>fbf-2</i>       | 67/70           | 0/62                  |
| Feminized germline |                 |                       |
|                    | <i>rrf-1</i>    | <i>lag-2&gt;RDE-1</i> |
| <i>control</i>     | 0/21            | 0/17                  |
| <i>fog-3</i>       | 21/24           | 0/42                  |

**RNAi to the muscle-expressed gene *emb-9***

|                | Ruptured through the vulva |                       |
|----------------|----------------------------|-----------------------|
|                | <i>rrf-3</i>               | <i>lag-2&gt;RDE-1</i> |
| <i>control</i> | 0/48                       | 0/207                 |
| <i>emb-9</i>   | 24/35                      | 0/136                 |

**RNAi to known DTC-expressed genes**

|                | Migration defect      |
|----------------|-----------------------|
|                | <i>lag-2&gt;RDE-1</i> |
| <i>control</i> | 0/52                  |
| <i>gon-1</i>   | 39/40                 |
| <i>mig-38</i>  | 29/52                 |

The DTC-specific RNAi strain [*lag-2>NeonGreen::F2A::RDE-1*; *rrf-3(pk1426)*; *rde-1(ne219)*] was compared to the germline-specific *rrf-1(pk1417)* and the whole-body RNAi-sensitized *rrf-3(pk1426)* backgrounds. RNAi control (empty vector L4440) was compared to RNAi-depleted animals. Adult animals were scored following parental plating on RNAi for knockdown of germline-expressed genes and following L1 plating on RNAi for knockdown of DTC- and muscle-expressed genes.
