# Supplementary material
Source: PubMed Central journal article supplement (PMC5560089)

Figure S1

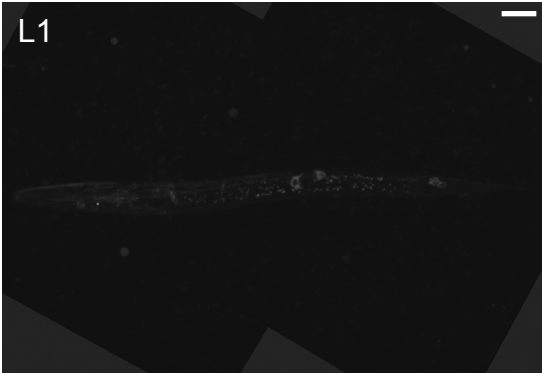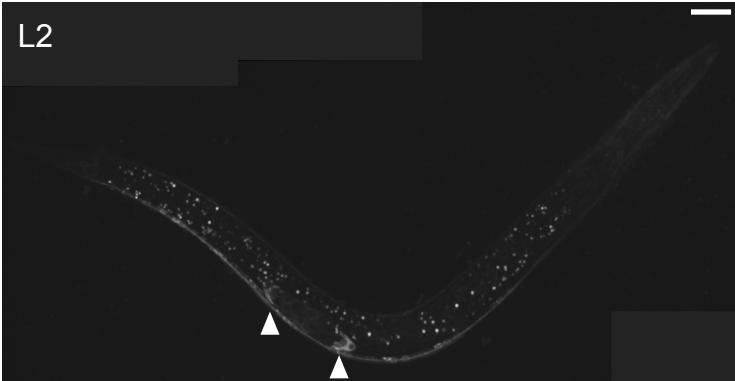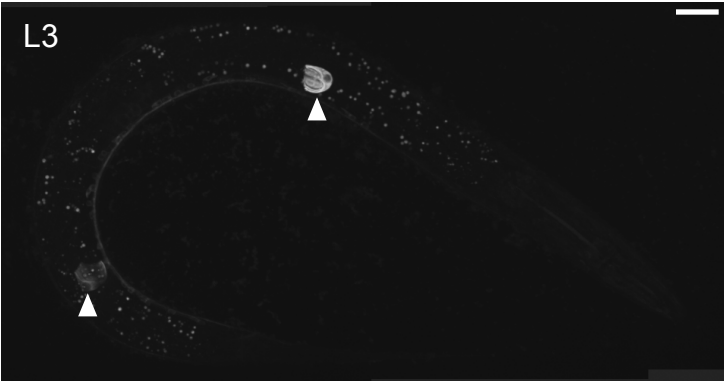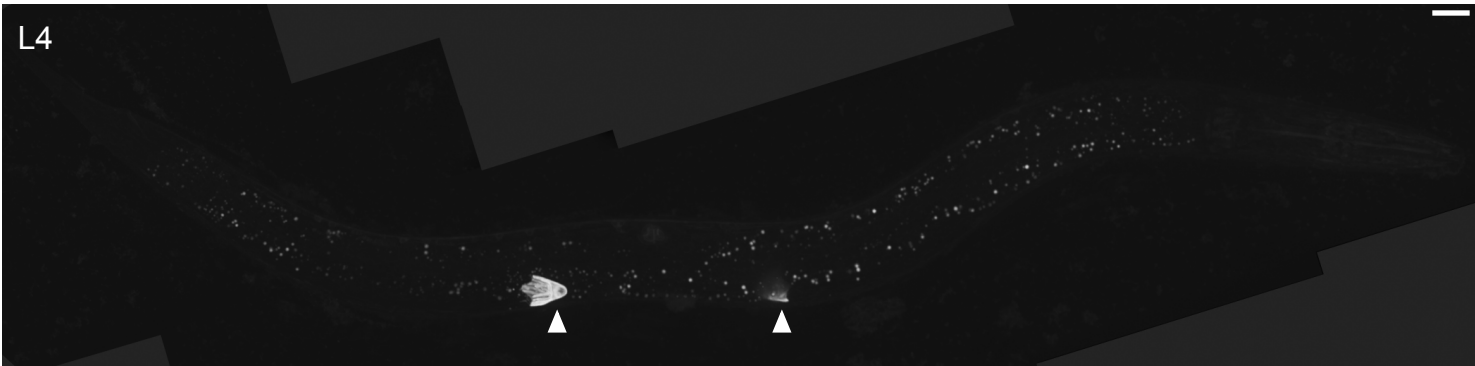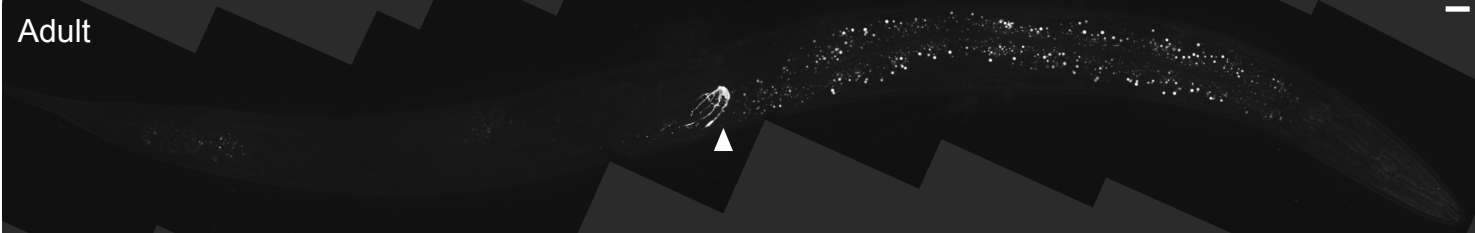

Supplement: NIHMS890511-supplement-1.pdf [file NIHMS890511-supplement-1.pdf]

Figure S2

A

DAPI-stained animals

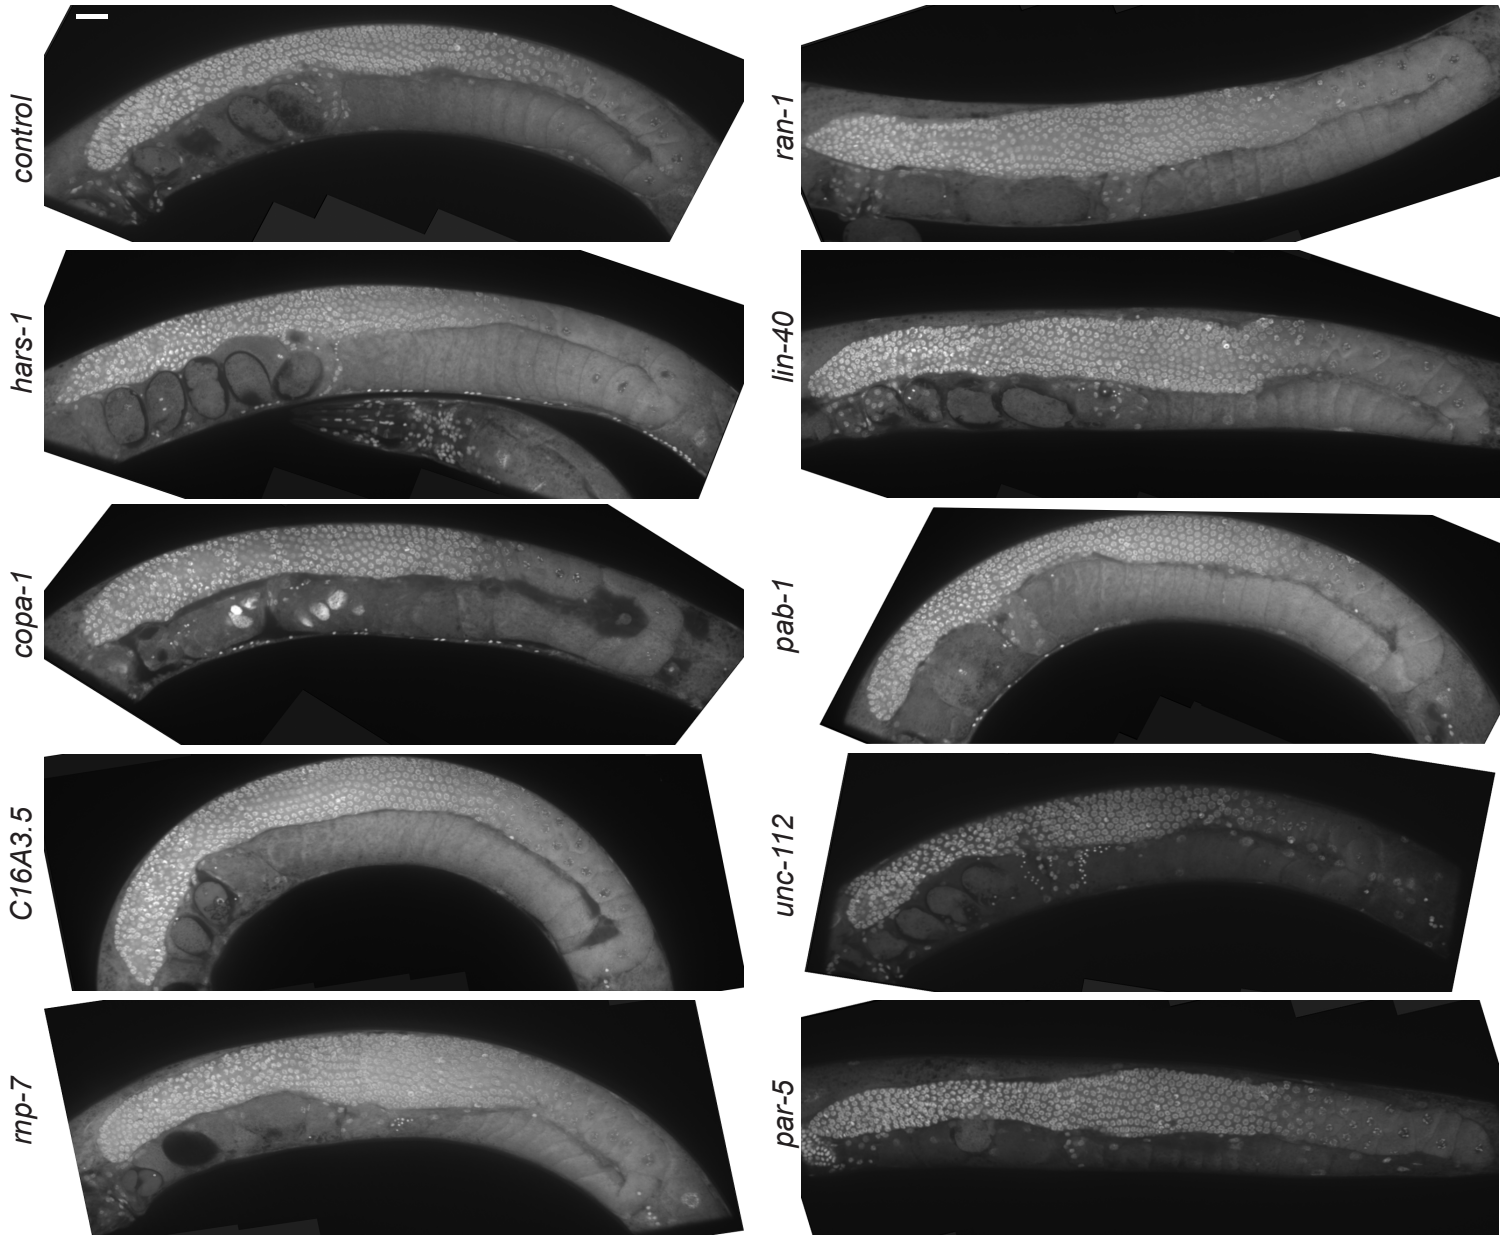

B

germ cells (*mex-5* > *H2B::mCherry*)

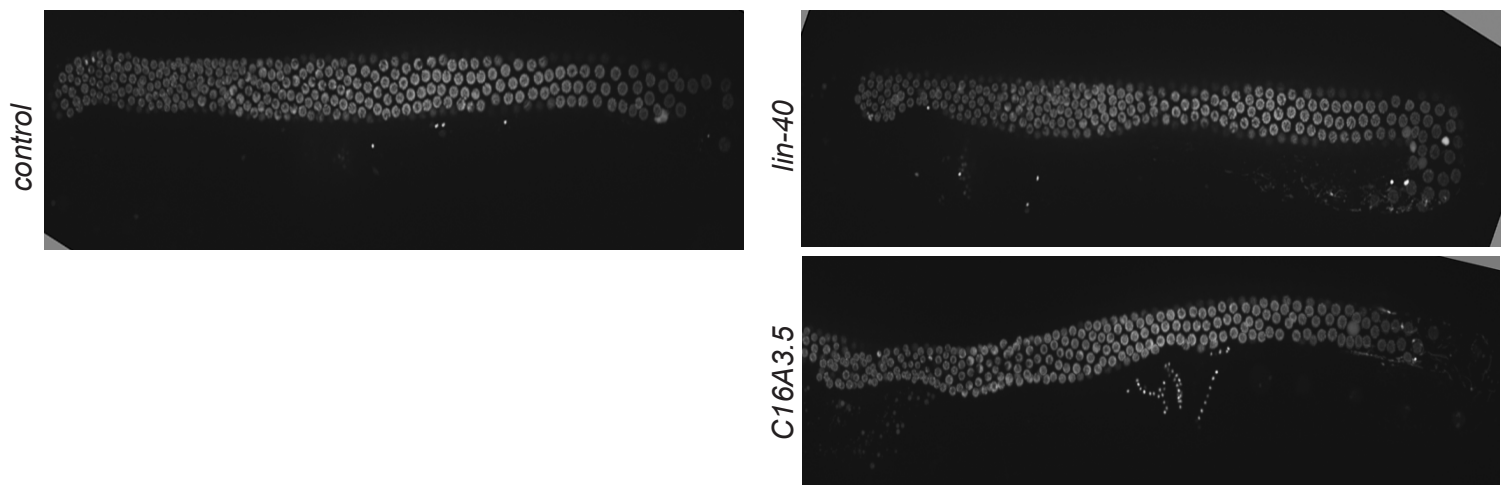

Supplement: NIHMS890511-supplement-2.pdf [file NIHMS890511-supplement-2.pdf]

Figure S3

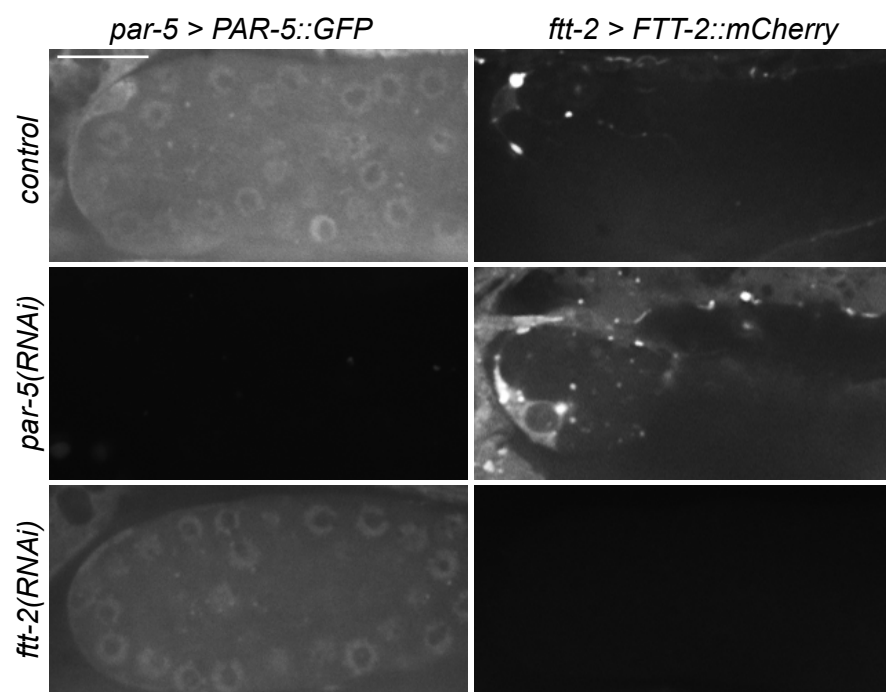

Supplement: NIHMS890511-supplement-3.pdf [file NIHMS890511-supplement-3.pdf]

Figure S4

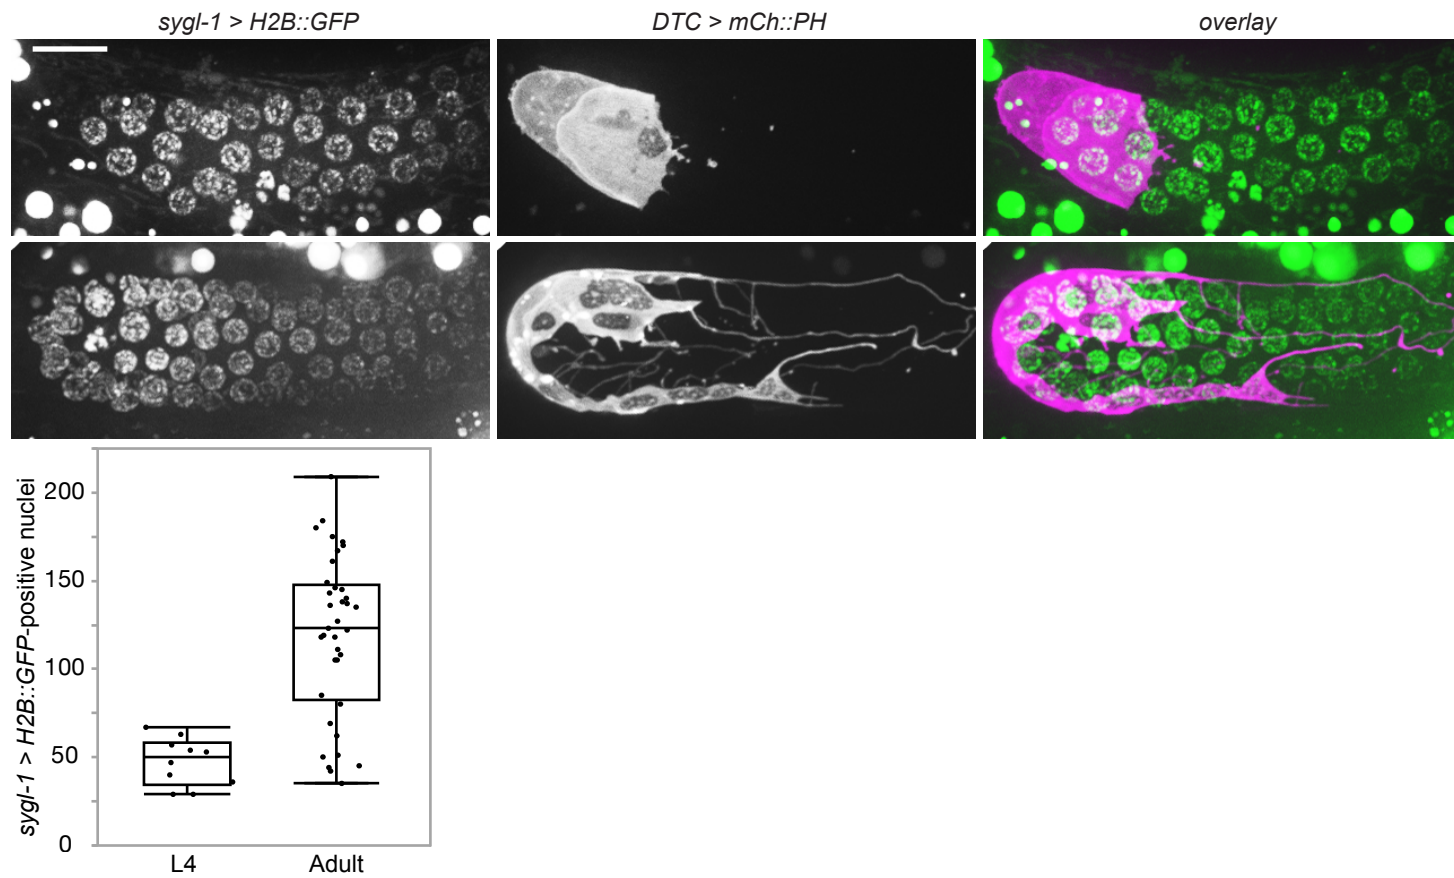

Supplement: NIHMS890511-supplement-4.pdf [file NIHMS890511-supplement-4.pdf]
